# Supplementary material for: Comprehensive expression analysis with cell-type-specific transcriptome in ALS-linked mutant SOD1 mice: Revisiting the active role of glial cells in disease
Source: PubMed Central journal article supplement (PMC9846815; doi:10.3389/fncel.2022.1045647), 2023-01-04
Supplement: Data_Sheet_1.pdf [file Data_Sheet_1.pdf]

Figure S1

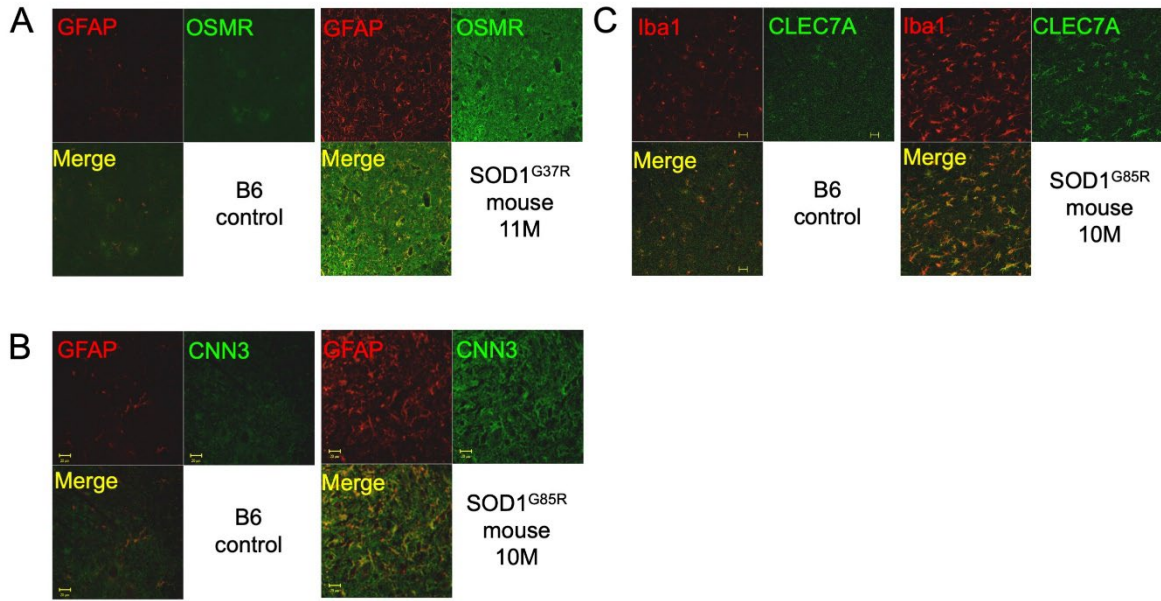

Figure S2

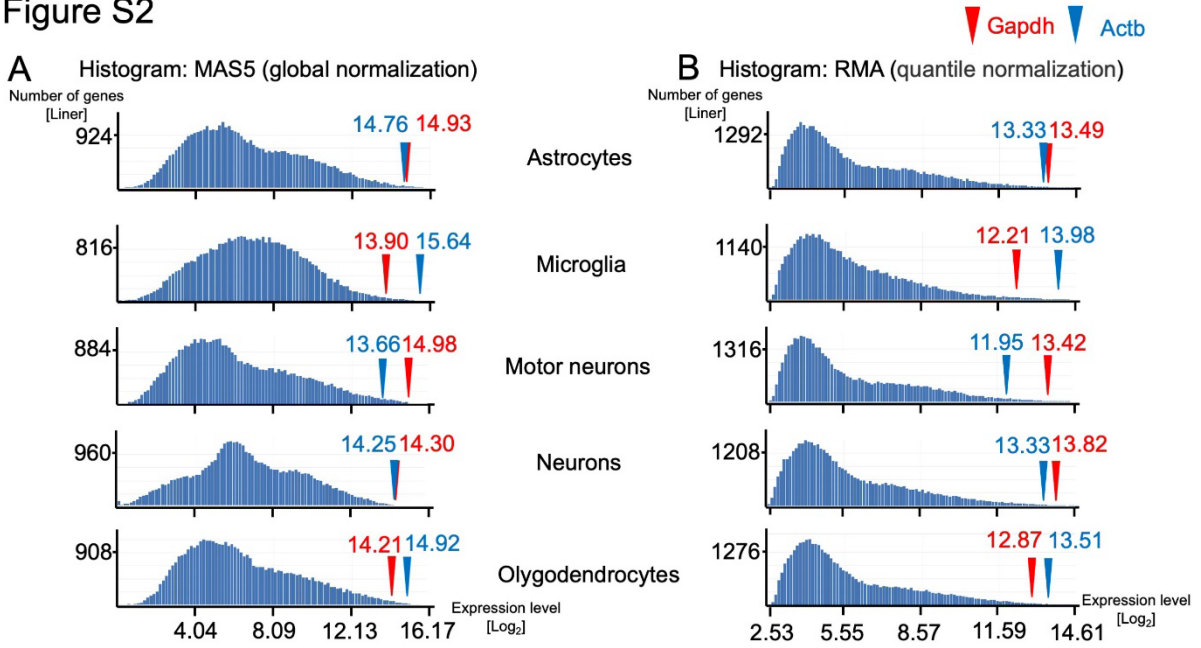

Table S1

|              | ALS mouse model (SOD1 activity),<br>Age, Replicates  | Control (SOD1 activity),<br>Age, Replicates               | Data source    |
|--------------|------------------------------------------------------|-----------------------------------------------------------|----------------|
| Comparison 1 | G37R SOD1 Tg ( <b>increased</b> ),<br>11 months, N=3 | WT SOD1 Tg ( <b>increased</b> ),<br>11 months, N=3        | our experiment |
| Comparison 2 | G85R SOD1 Tg ( <b>unchanged</b> ),<br>11 months, N=3 | Non-Tg littermate ( <b>unchanged</b> ),<br>11 months, N=3 | our experiment |
| Comparison 3 | G93A SOD1 Tg ( <b>increased</b> ),<br>4 months, N=3  | Non-Tg littermate ( <b>unchanged</b> ),<br>4 months, N=3  | public deposit |
|              | GEO accession number                                 |                                                           |                |
|              | GSM462482, 462483, 462484                            | GSM462461, 462462, 462463                                 |                |

Table S2

| A | Cell type        | Sample source  | Isolation methods  | GEO accession number         |
|---|------------------|----------------|--------------------|------------------------------|
|   | Motor neurons    | P60 ventral SC | LCM                | GSM113702, 113703, 113704    |
|   | Neurons          | P16 brain      | Negative selection | GSM241897                    |
|   | Astrocytes       | P17 brain      | S100 $\beta$ -FACS | GSM241912, 241914, 241926    |
|   | Microglia        | P90 lumbar SC  | CD11b-FACS         | GSM2527942, 2527943, 2527944 |
|   | Oligodendrocytes | P16 brain      | MOG-immunopanned   | GSM241890, 241893, 241894    |

  

| B | Disease stages    | Cell type                  | Sample source | Isolation methods | GEO accession number         |
|---|-------------------|----------------------------|---------------|-------------------|------------------------------|
|   | Control           | P90-Microglia (littermate) | P90 lumbar SC | CD11b-FACS        | GSM2527942, 2527943, 2527944 |
|   | Early-symptomatic | P90-Microglia (G93A)       | P90 lumbar SC | CD11b-FACS        | GSM2527939, 2527940, 2527941 |

  

| C | Disease stages    | Cell type                    | Sample source  | Isolation methods | GEO accession number         |
|---|-------------------|------------------------------|----------------|-------------------|------------------------------|
|   | Control           | P90-Astrocytes (littermate)  | P90 lumbar SC  | LCM               | GSM1694233, 1694234, 1694235 |
|   | Early-symptomatic | P90-Astrocytes (G93A)        | P90 lumbar SC  | LCM               | GSM1694230, 1694231, 1694232 |
|   | Control           | P120-Astrocytes (littermate) | P120 lumbar SC | LCM               | GSM1694239, 1694240, 1694241 |
|   | Late-symptomatic  | P120-Astrocytes (G93A)       | P120 lumbar SC | LCM               | GSM1694236, 1694237, 1694238 |

  

| D | Disease stages    | Cell type                       | Sample source  | Isolation methods | GEO accession number                  |
|---|-------------------|---------------------------------|----------------|-------------------|---------------------------------------|
|   | Control           | P56-Motor neurons (littermate)  | P56 lumbar SC  | LCM               | GSM1128299, 1128300, 1128301, 1128302 |
|   | Pre-symptomatic   | P56-Motor neurons (G93A)        | P56 lumbar SC  | LCM               | GSM1128295, 1128296, 1128297, 1128298 |
|   | Control           | P101-Motor neurons (littermate) | P101 lumbar SC | LCM               | GSM1128315, 1128316, 1128317, 1128318 |
|   | Early-symptomatic | P101-Motor neurons (G93A)       | P101 lumbar SC | LCM               | GSM1128311, 1128312, 1128313, 1128314 |
|   | Control           | P111-Motor neurons (littermate) | P111 lumbar SC | LCM               | GSM1128331, 1128332, 1128333, 1128334 |
|   | Symptomatic       | P111-Motor neurons (G93A)       | P111 lumbar SC | LCM               | GSM1128327, 1128328, 1128329, 1128330 |
|   | Control           | P121-Motor neurons (littermate) | P121 lumbar SC | LCM               | GSM1128347, 1128348, 1128349, 1128350 |
|   | Late-symptomatic  | P121-Motor neurons (G93A)       | P121 lumbar SC | LCM               | GSM1128343, 1128344, 1128345, 1128346 |

Table S3

| Gene Symbol | Integrated transcriptome (A.U.) |         |            |           |                  | Microglia fold-enrichment vs. CNS cell-types (Microarray) <b>Our data</b> | Microglia fold-enrichment vs. CNS cell-types (RNAseq) <b>From Chiu et al.</b> | Gene Title                                                                  |
|-------------|---------------------------------|---------|------------|-----------|------------------|---------------------------------------------------------------------------|-------------------------------------------------------------------------------|-----------------------------------------------------------------------------|
|             | Motor Neurons                   | Neurons | Astrocytes | Microglia | Oligodendrocytes |                                                                           |                                                                               |                                                                             |
| Olfml3      | 25                              | 36      | 59         | 12371     | 190              | 65                                                                        | 7                                                                             | olfactomedin-like 3                                                         |
| Tmem119     | 89                              | 133     | 40         | 16388     | 226              | 72                                                                        | 10                                                                            | transmembrane protein 119                                                   |
| Siglec H    | 28                              | 59      | 15         | 5212      | 88               | 59                                                                        | 9                                                                             | sialic acid binding Ig-like lectin H                                        |
| Slc2a5      | 66                              | 88      | 65         | 589       | 84               | 7                                                                         | 21                                                                            | solute carrier family 2 (facilitated glucose transporter), member 5         |
| Gal3s4      | 72                              | 10      | 1172       | 6242      | 105              | 5                                                                         | 6                                                                             | galactose-3-O-sulfotransferase 4                                            |
| Csmd3       | 49                              | 64      | 18         | 134       | 31               | 2                                                                         | 8                                                                             | CUB and Sushi multiple domains 3                                            |
| Slco2b1     | 83                              | 58      | 80         | 20236     | 102              | 198                                                                       | 15                                                                            | solute carrier organic anion transporter family, member 2b1                 |
| Gpr84       | 22                              | 130     | 10         | 3107      | 86               | 24                                                                        | 15                                                                            | G protein-coupled receptor 84                                               |
| Lag3        | 9                               | 18      | 26         | 901       | 31               | 29                                                                        | 15                                                                            | lymphocyte-activation gene 3                                                |
| Adora3      | 5                               | 52      | 50         | 520       | 15               | 10                                                                        | 9                                                                             | adenosine A3 receptor//transmembrane and immunoglobulin domain containing 3 |
| Ccl4        | 64                              | 235     | 127        | 3394      | 275              | 12                                                                        | 7                                                                             | chemokine (C-C motif) ligand 4                                              |
| Golm1       | 265                             | 343     | 1180       | 9027      | 263              | 8                                                                         | 7                                                                             | golgi membrane protein 1                                                    |
| P2ry13      | 67                              | 49      | 55         | 12702     | 151              | 84                                                                        | 34                                                                            | purinergic receptor P2Y, G-protein coupled 13                               |

Table S4

| Cell type        | Gene symbol   | Integrated transcriptome (A.U.) |        |           |           |                 | SOD1 <sup>G93A</sup> cell-type transcriptome (A.U.) |                    |             |                  |                    |              |             |                     |                     |             |                    |              |             |                     |              |             |                     |              |             |                     |            |
|------------------|---------------|---------------------------------|--------|-----------|-----------|-----------------|-----------------------------------------------------|--------------------|-------------|------------------|--------------------|--------------|-------------|---------------------|---------------------|-------------|--------------------|--------------|-------------|---------------------|--------------|-------------|---------------------|--------------|-------------|---------------------|------------|
|                  |               | Motor Neuron                    | Neuron | Astrocyte | Microglia | Oligodendrocyte | Microglia (FACS)                                    |                    |             | Astrocytes (LCM) |                    |              |             |                     | Motor neurons (LCM) |             |                    |              |             |                     |              |             |                     |              |             |                     |            |
|                  |               |                                 |        |           |           | G93A-P90-MG     | NTg-P90-MG                                          | G93A-P90-MG (F.C.) | G93A-P90-AS | NTg-P90-AS       | G93A-P90-AS (F.C.) | G93A-P120-AS | NTg-P120-AS | G93A-P120-AS (F.C.) | G93A-P56-MN         | NTg-P56-MN  | G93A-P56-MN (F.C.) | G93A-P101-MN | NTg-P101-MN | G93A-P101-MN (F.C.) | G93A-P111-MN | NTg-P111-MN | G93A-P111-MN (F.C.) | G93A-P121-MN | NTg-P121-MN | G93A-P121-MN (F.C.) |            |
| General          | <b>Actb</b>   | 12978                           | 19436  | 27715     | 51118     | 31061           | 52574                                               | 51118              | 1.0         | 41280            | 43363              | 1.0          | 39159       | 23950               | 1.6                 | 23114       | 33182              | 0.7          | 26827       | 23536               | 1.1          | 22377       | 21593               | 1.0          | 44037       | 23428               | 1.9        |
| General          | <b>Gapdh</b>  | 32304                           | 20116  | 31176     | 15320     | 18997           | 22191                                               | 15320              | 1.4         | 25016            | 25224              | 1.0          | 18770       | 20772               | 0.9                 | 32096       | 49938              | 0.6          | 20432       | 23614               | 0.9          | 22629       | 21209               | 1.1          | 27912       | 22530               | 1.2        |
| Motor neuron     | <b>Mnx1</b>   | 891                             | 25     | 45        | 14        | 6               | 4                                                   | 14                 | 0.3         | <b>148</b>       | <b>200</b>         | 0.7          | <b>86</b>   | <b>122</b>          | 0.7                 | 392         | 317                | 1.2          | 243         | 488                 | 0.5          | 147         | 367                 | 0.4          | 116         | 279                 | 0.4        |
| Neuron           | <b>Snap25</b> | 21555                           | 21916  | 344       | 124       | 149             | 38                                                  | 124                | 0.3         | <b>13539</b>     | <b>17024</b>       | 0.8          | <b>7441</b> | <b>18893</b>        | 0.4                 | 42185       | 42198              | 1.0          | 33624       | 37514               | 0.9          | 34875       | 34188               | 1.0          | 16637       | 51644               | 0.3        |
| Astrocytes       | <b>Gfap</b>   | 136                             | 69     | 3710      | 83        | 111             | 132                                                 | 83                 | 1.6         | 5269             | 1930               | 2.7          | 2542        | 273                 | 9.3                 | 423         | 825                | 0.5          | <b>2928</b> | <b>778</b>          | 3.8          | <b>3730</b> | 479                 | <b>7.8</b>   | <b>6578</b> | 904                 | <b>7.3</b> |
| Microglia        | <b>Ilgam</b>  | 25                              | 5      | 34        | 1159      | 30              | 1394                                                | 1159               | 1.2         | 33               | 15                 | 2.2          | 26          | 47                  | 0.6                 | 7           | 25                 | 0.3          | 32          | 15                  | 2.1          | 22          | 18                  | 1.2          | 42          | 28                  | 1.5        |
| Oligodendrocyte  | <b>Mog</b>    | 598                             | 6      | 14        | 152       | 25990           | 118                                                 | 152                | 0.8         | <b>2621</b>      | <b>2543</b>        | 1.0          | <b>1740</b> | <b>1466</b>         | 1.2                 | <b>1874</b> | <b>2513</b>        | 0.7          | <b>3192</b> | <b>3497</b>         | 0.9          | <b>2761</b> | <b>2581</b>         | 1.1          | <b>3411</b> | <b>2054</b>         | 1.7        |
| Endocelial cells | <b>Ocln</b>   | 29                              | 86     | 78        | 78        | 14              | 86                                                  | 78                 | 1.1         | 74               | 63                 | 1.2          | 94          | 113                 | 0.8                 | 217         | 225                | 1.0          | 142         | 208                 | 0.7          | 162         | 192                 | 0.8          | 180         | 178                 | 1.0        |

Table S6

| Cell type | Gene symbol  | Excitatory neurons        | Inhibitory neurons | Astrocytes | Microglia | Oligodendrocytes |
|-----------|--------------|---------------------------|--------------------|------------|-----------|------------------|
|           |              | Single cell RNAseq (nTPM) |                    |            |           |                  |
| General   | <b>ACTB</b>  | 129.3                     | 101.3              | 142.4      | 259.5     | 302.2            |
| General   | <b>GAPDH</b> | 112.1                     | 145.8              | 228.2      | 86.2      | 196.2            |

Table S7

| Caspase Classes          | Gene Symbol    | Spinal cord (F.C.) |      |      | Integrated transcriptome (A.U.) |         |            |           |                  | MG (F.C.)   | Astrocytes (F.C.) |           |           | Motor neurons (F.C.) |           |           |                                                | Gene Title |
|--------------------------|----------------|--------------------|------|------|---------------------------------|---------|------------|-----------|------------------|-------------|-------------------|-----------|-----------|----------------------|-----------|-----------|------------------------------------------------|------------|
|                          |                | G93A               | G85R | G37R | Motor Neurons                   | Neurons | Astrocytes | Microglia | Oligodendrocytes | G93A-P90-MG | G93A-P90          | G93A-P120 | G93A-P56- | G93A-P101            | G93A-P111 | G93A-P121 |                                                |            |
| Inflammation             | Casp1          | 2.0                | 1.6  | 2.0  | 48                              | 54      | 26         | 1785      | 25               | 0.9         | 1.5               | 2.7       | 6.5       | 3.0                  | 1.1       | 2.4       | caspase 1                                      |            |
|                          | Casp4 (Casp11) | 6.9                | 12.6 | 7.6  | 7                               | 6       | 6          | 1328      | 6                | 1.5         | 4.3               | 16.9      | 2.0       | 1.6                  | 15.2      | 14.8      | caspase4, apoptosis-related cysteine peptidase |            |
|                          | Casp12         | 2.9                | 3.3  | 3.4  | 110                             | 78      | 22         | 57        | 46               | 1.1         | 2.2               | 3.1       | 1.6       | 2.3                  | 2.5       | 3.6       | caspase 12                                     |            |
| Executioner of Apoptosis | Il1b           | 0.9                | 1.6  | 2.2  | 50                              | 71      | 66         | 6254      | 56               | 1.2         | 0.9               | 2.3       | 1.1       | 1.5                  | 1.4       | 1.0       | interleukin 1 beta                             |            |
|                          | Casp3          | 1.6                | 1.3  | 1.2  | 261                             | 1002    | 952        | 3157      | 1505             | 0.8         | 1.3               | 1.6       | 0.8       | 1.8                  | 1.9       | 2.3       | caspase 3                                      |            |
|                          | Casp6          | 2.2                | 1.1  | 1.3  | 63                              | 121     | 811        | 420       | 275              | 1.3         | 1.1               | 1.5       | 3.4       | 1.4                  | 1.6       | 5.8       | caspase 6                                      |            |
| Initiator of Apoptosis   | Casp7          | 1.8                | 1.3  | 1.7  | 63                              | 253     | 402        | 673       | 108              | 1.2         | 1.4               | 1.4       | 0.8       | 0.9                  | 1.6       | 3.3       | caspase 7                                      |            |
|                          | Casp2          | 1.2                | 1.1  | 1.1  | 119                             | 605     | 843        | 992       | 959              | 1.2         | 1.2               | 1.3       | 0.9       | 1.4                  | 1.6       | 0.8       | caspase 2                                      |            |
|                          | Casp8          | 1.4                | 2.2  | 1.8  | 62                              | 76      | 115        | 1764      | 107              | 1.3         | 1.8               | 2.3       | 1.7       | 1.5                  | 1.7       | 2.9       | caspase 8                                      |            |
| Apoptosis                | Casp9          | 1.0                | 1.1  | 1.1  | 533                             | 282     | 664        | 588       | 342              | 1.0         | 1.2               | 0.7       | 0.7       | 1.0                  | 1.0       | 0.8       | caspase 9                                      |            |
|                          | Casp14         | 0.9                | 0.9  | 0.9  | 203                             | 265     | 212        | 543       | 167              | 0.9         | 1.3               | 1.6       | 0.8       | 1.6                  | 1.4       | 1.8       | caspase 14                                     |            |



Table S8

| Family | Gene Symbol | Synonyms (or protein names) | Spinal cord (F.C.) |      |       | Integrated transcriptome (A.U.) |         |            |           |                  | MG (F.C.)   | Astrocytes (F.C.) |           |          | Motor neurons (F.C.) |           |                                                      | Gene Title                                                 |
|--------|-------------|-----------------------------|--------------------|------|-------|---------------------------------|---------|------------|-----------|------------------|-------------|-------------------|-----------|----------|----------------------|-----------|------------------------------------------------------|------------------------------------------------------------|
|        |             |                             | G93A               | G85R | G37R  | Motor Neurons                   | Neurons | Astrocytes | Microglia | Oligodendrocytes | G93A-P90-MG | G93A-P90          | G93A-P120 | G93A-P56 | G93A-P101            | G93A-P111 | G93A-P121                                            |                                                            |
| HspA   | Hspa1a      | Hsp70-3                     | 1.5                | 1.2  | 1.3   | 580                             | 1169    | 2070       | 27954     | 2084             | 0.6         | 0.6               | 1.5       | 2.7      | 1.5                  | 1.2       | 1.1                                                  | heat shock protein 1A                                      |
|        | Hspa1b      | Hsp70-1                     | 1.7                | 2.0  | 2.5   | 119                             | 660     | 3268       | 16398     | 3277             | 0.8         | 3.0               | 2.6       | 1.6      | 1.9                  | 0.5       | 1.1                                                  | heat shock protein 1B                                      |
|        | Hspa2       | Hsp70-2                     | 2.3                | 1.4  | 1.7   | 147                             | 1001    | 1728       | 444       | 2155             | 0.9         | 1.2               | 1.8       | 1.1      | 1.3                  | 1.5       | 2.0                                                  | heat shock protein 2                                       |
|        | Hspa5       | Grp78/BiP                   | 1.2                | 1.1  | 1.3   | 16006                           | 11443   | 28164      | 30777     | 15067            | 1.4         | 1.0               | 0.8       | 1.1      | 1.1                  | 1.2       | 1.2                                                  | heat shock protein 5                                       |
|        | Hspa8       | Hsc70/73                    | 1.1                | 1.0  | 1.0   | 8363                            | 18279   | 3798       | 9785      | 8769             | 0.8         | 0.7               | 0.8       | 1.1      | 1.0                  | 0.9       | 0.7                                                  | heat shock protein 8                                       |
|        | Hspa9       | Hsp74/Grp75                 | 1.1                | 0.9  | 1.1   | 7522                            | 5050    | 5432       | 2382      | 3811             | 1.3         | 0.9               | 0.8       | 1.1      | 0.9                  | 0.9       | 1.1                                                  | heat shock protein 9                                       |
|        | Hspa12a     | -                           | 1.0                | 0.8  | 0.9   | 135                             | 112     | 17         | 66        | 20               | 0.8         | 1.2               | 0.5       | 0.9      | 0.7                  | 1.1       | 0.3                                                  | heat shock protein 12A                                     |
|        | Hspa12b     | -                           | 0.6                | 1.1  | 0.4   | 18                              | 9       | 5          | 26        | 5                | 0.7         | 1.2               | 0.4       | 1.0      | 1.7                  | 0.4       | 1.7                                                  | heat shock protein 12B                                     |
|        | Hspa13      | -                           | 1.2                | 1.0  | 1.0   | 1775                            | 2434    | 1611       | 1377      | 1889             | 1.0         | 0.8               | 0.7       | 1.6      | 1.0                  | 1.1       | 0.9                                                  | heat shock protein 70 family, member 13                    |
|        | Hspa14      | Hsp70-4                     | 1.1                | 1.1  | 1.0   | 1036                            | 1032    | 1063       | 1230      | 1165             | 1.0         | 0.9               | 0.7       | 1.0      | 0.8                  | 0.7       | 0.7                                                  | heat shock protein 14                                      |
|        | Hspb1       | Hsp25/27                    | 3.5                | 4.9  | 4.7   | 11847                           | 314     | 828        | 836       | 198              | 1.5         | 1.3               | 4.8       | 1.6      | 1.0                  | 1.2       | 4.4                                                  | heat shock protein 1                                       |
|        | Hspb2       | HspB2                       | 1.6                | 1.4  | 1.0   | 28                              | 172     | 84         | 40        | 135              | 2.0         | 1.1               | 1.8       | 1.3      | 1.3                  | 0.6       | 2.0                                                  | heat shock protein 2                                       |
|        | Hspb3       | HspB3                       | 0.7                | 2.4  | 2.5   | 6                               | 134     | 34         | 314       | 65               | 0.9         | 1.6               | 4.6       | 2.0      | 2.7                  | 1.2       | 1.2                                                  | heat shock protein 3                                       |
|        | Hspb6       | HspB6                       | 2.5                | 2.6  | 2.5   | 388                             | 229     | 1459       | 155       | 354              | 1.2         | 1.6               | 2.9       | 1.1      | 1.1                  | 1.6       | 3.5                                                  | heat shock protein, alpha-crystallin-related, B6           |
| Hspb7  | Hsp25-2     | 0.8                         | 0.6                | 0.7  | 11    | 163                             | 56      | 38         | 39        | 1.4              | 2.1         | 2.2               | 1.0       | 0.9      | 0.9                  | 0.9       | heat shock protein family, member 7 (cardiovascular) |                                                            |
| Hspb8  | Hsp22       | 1.4                         | 1.4                | 1.4  | 11728 | 139                             | 1116    | 95         | 18        | 1.0              | 0.8         | 1.7               | 1.6       | 0.8      | 0.9                  | 1.2       | heat shock protein 8                                 |                                                            |
| Hspb9  | HspB9       | 0.4                         | 1.2                | 0.7  | 16    | 2                               | 9       | 8          | 3         | 0.9              | 0.3         | 0.3               | 0.5       | 1.0      | 1.3                  | 2.5       | heat shock protein, alpha-crystallin-related, B9     |                                                            |
| Hspb11 | -           | 1.1                         | 1.1                | 1.2  | 1535  | 857                             | 866     | 670        | 2582      | 0.9              | 0.8         | 1.7               | 1.1       | 1.0      | 1.0                  | 1.4       | heat shock protein family B (small), member 11       |                                                            |
| HspC   | Hsp90aa1    | Hsp90α                      | 1.2                | 0.9  | 1.0   | 24590                           | 10514   | 5699       | 14260     | 12523            | 0.8         | 0.6               | 0.6       | 1.2      | 0.7                  | 0.6       | 0.4                                                  | heat shock protein 90, alpha (cytosolic), class A member 1 |
|        | Hsp90ab1    | Hsp90β                      | 1.0                | 1.1  | 1.0   | 12484                           | 12353   | 5353       | 3516      | 9650             | 1.3         | 0.9               | 0.9       | 1.1      | 0.9                  | 0.8       | 0.9                                                  | heat shock protein 90 alpha (cytosolic), class B member 1  |
|        | Hsp90b1     | Grp94                       | 1.2                | 1.1  | 1.2   | 1352                            | 8078    | 5374       | 15644     | 6596             | 1.0         | 0.8               | 0.9       | 1.2      | 1.1                  | 1.0       | 0.9                                                  | heat shock protein 90, beta (Grp94), member 1              |
| Hsp60  | Hspd1       | Hsp60                       | 1.0                | 1.0  | 1.1   | 18430                           | 6555    | 4095       | 3197      | 4248             | 1.6         | 1.1               | 0.7       | 1.3      | 0.9                  | 0.8       | 0.5                                                  | heat shock protein 1 (chaperonin)                          |
| Hsp10  | Hspe1       | Hsp10                       | 1.0                | 1.1  | 1.0   | 695                             | 466     | 343        | 546       | 384              | 1.2         | 1.3               | 1.1       | 0.7      | 0.8                  | 0.7       | 0.7                                                  | heat shock protein 1 (chaperonin 10)                       |
| Hsp110 | Hspa4       | Apg2/Hsp110                 | 1.2                | 0.9  | 1.1   | 4395                            | 1467    | 1980       | 1772      | 3646             | 1.5         | 1.0               | 0.9       | 1.4      | 0.9                  | 0.9       | 1.0                                                  | heat shock 70 kDa protein 4 (heat shock protein 4)         |
|        | Hspa4l      | Apg1/Osp94                  | 0.8                | 0.8  | 0.9   | 4861                            | 2235    | 1689       | 242       | 1151             | 0.9         | 0.9               | 0.3       | 1.4      | 0.8                  | 0.8       | 0.3                                                  | heat shock 70 kDa protein 4L (heat shock protein 4 like)   |
|        | Hsph1       | Hsp105/Hsp110               | 0.9                | 0.9  | 1.1   | 16847                           | 9861    | 2861       | 6426      | 6777             | 0.8         | 0.9               | 0.7       | 1.3      | 0.9                  | 0.9       | 0.6                                                  | heat shock 105kDa/110kDa protein 1                         |
