# Supplementary material for: Comprehensive expression analysis with cell-type-specific transcriptome in ALS-linked mutant SOD1 mice: Revisiting the active role of glial cells in disease
Source: Front Cell Neurosci. 2023 Jan 4;16:1045647. doi: 10.3389/fncel.2022.1045647 (PMC9846815; doi:10.3389/fncel.2022.1045647)
Supplement: Supplementary Table 5 — Total list of the 207 DEGs classified by molecular function using the PANTHER classification system. Column B is the top category of PANTHER protein class, column C is its child category, columns D and E are also in the child categories of their above category, and column F is the most specific (bottom) category of the gene. Column G shows gene symbols. The second row in columns H, J, L, and N to AC represents isolation methods for samples. Columns H, J, and L show gene expression fold changes in spinal cords of SOD1G93A, SOD1G85R, and SOD1G37R mutant mice, respectively. Columns I, K, and M show corresponding p-values of fold changes. Columns N to R show the integrated transcriptome. Values in enriched cell types are shown in bold font. Columns S to Y show the SOD1G93A cell-type transcriptome. Columns Z, AA, AB, and AC show gene expression fold changes in spinal cords of SOD1G93A mutant mice at 70, 98, 112, and 126 days old, respectively, and accession numbers in GEO are GSM462476 to GSM462487 for mutant mice and GSM462455 to GSM462466 for control mice (three biological replicates each). Columns AD, AE, and AF are probe set IDs in the Affymetrix array, Entrez Gene ID, and gene title, respectively. Rows for gene categories not included in the 207 DEG are collapsed. [file Table_5.xlsx]

## Sheet: 207DEGs
	PANTHER Protein Class	PANTHER Protein Class	PANTHER Protein Class	PANTHER Protein Class	PANTHER Protein Class	Gene Symbol	G93A-P112-SC	G93A-P112-SC	G85R-SC	G85R-SC	G37R-SC	G37R-SC	Motor Neuron	Neuron	Astrocyte	Microglia	Oligodendrocyte	G93A-P90-MG	G93A-P90-AS	G93A-P120-AS	G93A-P56-MN	G93A-P101-MN	G93A-P111-MN	G93A-P121-MN	G93A-P70-SC	G93A-P98-SC	G93A-P112-SC	G93A-P126-SC	Probe Set ID	Entrez Gene	Gene Title
	Top category	Second category (child of top category)	Third category (child of second category)	Fourth category (child of third category)	Most specific category		mixedtissue	p-value	mixedtissue	p-value	mixedtissue	p-value	LCM	Residual	FACS	FACS	Immunopanning	FACS	LCM	LCM	LCM	LCM	LCM	LCM	mixedtissue	mixedtissue	mixedtissue	mixedtissue
•	DNA metabolism protein				DNA metabolism protein(PC00009)	Parp3	3.28494	0.00104865	2.5079	0.0188073	2.04906	0.0106313	669.56	43.8036	274.907	333.885	78.0339	0.374435	1.60577	5.92124	1.81385	2.0907	2.34168	4.6135	0.872308	1.95381	3.28494	2.67452	1426210_x_at	235587	poly (ADP-ribose) polymerase family, member 3
					DNA metabolism protein(PC00009)	Top2a	2.55842	0.00168445	3.1834	0.00364569	3.75577	0.00908106	11.8311	80.7617	98.5908	960.057	42.6502	1.37275	2.69851	2.3011	1.02084	3.66128	2.4558	28.8521	0.935684	1.71289	2.55842	2.31157	1454694_a_at	21973	topoisomerase (DNA) II alpha
o		DNA glycosylase
o		DNA helicase
o		DNA ligase
o		DNA methyltransferase
o		DNA photolyase
o		DNA polymerase processivity factor
o		DNA strand-pairing protein
o		DNA topoisomerase
o		DNA-directed DNA polymerase
o		damaged DNA-binding protein
o		endodeoxyribonuclease
o		exodeoxyribonuclease
o		primase
o		replication origin binding protein
•	RNA metabolism protein
o		DNA-directed RNA polymerase
o		RNA helicase
o		RNA methyltransferase
o		RNA processing factor
			RNA splicing factor
			mRNA capping factor
			mRNA polyadenylation factor
o	RNA metabolism protein	endoribonuclease			endoribonuclease(PC00094)	Rnase4	3.0433	0.000807915	2.32814	0.00614614	2.0045	0.00213393	54.912	47.6747	40.3533	26563.8	285.69	0.904169	1.5341	4.27582	1.23306	4.27364	2.83551	13.0062	1.2853	1.27941	3.0433	3.10221	1422603_at	58809	ribonuclease, RNase A family 4
o		exoribonuclease
o		general transcription factor
•	calcium-binding protein				calcium-binding protein(PC00060)	Anxa3	4.80324	0.000232796	3.28379	0.00424802	3.21468	0.00143348	82.9531	102.818	111.217	6119.5	176.517	1.53227	3.3427	5.31047	1.1346	4.30717	3.29873	14.5221	1.17778	1.5207	4.80324	7.04373	1460330_at	11745	annexin A3
o		calmodulin-related			calmodulin-related(PC00061)	Aif1	6.06795	0.000169158	3.91792	0.00507183	3.74666	0.000311748	90.4887	13.6789	10.6423	5183.13	48.679	1.2701	2.51179	5.4269	1.74364	5.8722	2.91908	7.79438	0.582722	2.81768	6.06795	7.35255	1418204_s_at	11629	allograft inflammatory factor 1
					calmodulin-related(PC00061)	S100a11	3.36123	0.000839259	3.72329	0.00375205	2.51541	0.00615626	83.892	141.641	320.375	7445.52	50.7118	0.676622	1.86126	4.99399	0.899946	3.36453	3.42313	10.1903	1.19818	1.5269	3.36123	3.96253	1460351_at	20195	S100 calcium binding protein A11
					calmodulin-related(PC00061)	S100a4	9.65671	0.00158866	14.1767	0.00534751	8.32445	0.000975844	24.5904	46.2929	319.851	2931.61	25.2131	0.366094	5.28815	32.9345	0.708757	3.53654	6.38722	9.70253	3.11688	3.45599	9.65671	34.6918	1424542_at	20198	S100 calcium binding protein A4
					calmodulin-related(PC00061)	S100a6	4.01338	0.000393412	5.20498	0.00424942	4.51168	0.00113469	120.404	99.9707	1022.43	6827.57	934.68	0.499093	2.42777	8.75737	0.760034	3.57547	4.44694	10.2586	1.17669	1.67955	4.01338	4.47697	1421375_a_at	20200	S100 calcium binding protein A6 (calcyclin)
•	cell adhesion molecule				cell adhesion molecule(PC00069)	Cd34	4.2195	0.000234331	2.31706	0.0125544	2.03461	0.00264984	96.2024	981.657	82.2186	4181.92	19.9248	2.11708	1.66274	2.90723	1.04473	2.81365	2.99069	7.98306	0.912207	1.88042	4.2195	4.02281	1416072_at	12490	CD34 antigen
					cell adhesion molecule(PC00069)	Cx3cr1	3.18049	0.000194032	2.40916	0.00667659	2.05826	0.00429442	100.958	87.5212	53.9587	35240.6	437.035	0.992401	1.82409	3.41679	0.654562	3.76857	2.03528	5.77465	0.854003	1.79523	3.18049	2.27804	1450020_at	13051	chemokine (C-X3-C motif) receptor 1
					cell adhesion molecule(PC00069)	Icam1	5.07584	0.00406995	3.79996	0.00546954	5.97992	0.00255045	11.528	87.3683	121.152	9689.7	17.4715	1.31653	2.44804	8.91616	0.987587	3.46686	2.37564	15.5982	1.92935	2.04424	5.07584	4.58212	1424067_at	15894	intercellular adhesion molecule 1
					cell adhesion molecule(PC00069)	Postn	4.29686	0.000405884	2.418	0.0328896	6.13247	0.000155477	11.3927	249.296	39.7839	208.513	107.635	2.05415	0.741268	6.45861	0.901182	8.67359	4.36278	17.7898	1.6663	2.87504	4.29686	5.35368	1423606_at	50706	periostin, osteoblast specific factor
					cell adhesion molecule(PC00069)	Thbs2	3.76319	0.000748226	3.98981	0.00375205	3.66968	9.55187e-05	100.101	171.294	177.541	77.7499	27.7429	1.60695	1.51461	1.99695	0.49044	2.28116	2.91794	7.25609	0.997188	2.46926	3.76319	7.50264	1422571_at	21826	thrombospondin 2
o		cadherin
o		immunoglobulin superfamily cell adhesion molecule			immunoglobulin superfamily cell adhesion molecule(PC00125)	Siglecf	2.46538	0.00660316	4.23777	0.00424802	5.76321	0.00268222	11.4501	38.9691	9.95224	419.815	12.007	3.30828	7.40612	3.50455	0.393968	4.56462	4.34032	9.23367	3.0318	1.78533	2.46538	2.66573	1424975_at	233186	sialic acid binding Ig-like lectin F
o		integrin			integrin(PC00126)	Itgam	2.62525	0.00110499	2.59161	0.0318429	2.68865	0.00026962	24.5797	4.95306	33.9731	1158.66	29.9656	1.20321	2.21592	0.563946	0.267078	2.11026	1.1968	1.52312	1.48772	1.61817	2.62525	2.12898	1422046_at	16409	integrin alpha M
					integrin(PC00126)	Itgax	5.0795	0.000902044	6.4773	0.00328734	23.7866	3.90934e-05	17.065	69.8466	17.8725	635.621	53.3229	6.73925	12.5872	12.5621	0.42457	21.8181	10.969	18.2221	0.500319	9.27054	5.0795	14.3577	1419128_at	16411	integrin alpha X
					integrin(PC00126)	Itgb2	8.64025	0.00110499	5.95664	0.00364569	10.2552	4.1914e-05	32.2114	79.1795	33.2931	10915.1	88.516	1.52757	4.5072	15.1125	0.820752	10.0111	5.68722	14.7572	1.14	2.49131	8.64025	7.05354	1450678_at	16414	integrin beta 2
					integrin(PC00126)	Itgb5	2.26464	0.000683654	2.26136	0.00492034	2.27108	0.00026962	2184.16	79.9106	2855.77	28255.1	134.08	0.976901	1.52314	4.16133	0.970141	1.72341	1.63577	5.66111	0.861335	1.42535	2.26464	2.11026	1456195_x_at	16419	integrin beta 5
•	cell junction protein
o		gap junction
o		tight junction
•	chaperone				chaperone(PC00072)	Hspb1	3.4659	0.000611009	4.8697	0.0076655	4.74492	4.6679e-05	11847.1	313.881	827.751	835.74	198.348	1.45715	1.31088	4.82325	1.5558	0.98542	1.15194	4.3973	1.46499	1.44891	3.4659	4.71875	1422943_a_at	15507	heat shock protein 1
					chaperone(PC00072)	Hspb6	2.47452	0.00515298	2.5922	0.00546954	2.46173	0.000246421	388.083	228.687	1459.5	154.827	354.469	1.16787	1.61189	2.91949	1.09599	1.14011	1.60553	3.46522	1.03935	1.08612	2.47452	3.36413	1436332_at	243912	heat shock protein, alpha-crystallin-related, B6
o		Hsp100 family chaperone
o		Hsp60 family chaperone
o		Hsp70 family chaperone
o		Hsp90 family chaperone
o		chaperonin
•	chromatin/chromatin-binding, or -regulatory protein
o		centromere DNA-binding protein
o		histone
o		histone modifying enzyme
•	cytoskeletal protein				cytoskeletal protein(PC00085)	Emp1	5.35014	0.000575772	3.49975	0.0125716	3.25668	0.012219	72.7319	7.02125	111.583	231.393	27.3526	0.604492	1.32831	2.04104	1.65226	2.88614	2.57342	6.84731	0.993115	1.57207	5.35014	3.08767	1416529_at	13730	epithelial membrane protein 1
					cytoskeletal protein(PC00085)	Emp3	2.8477	0.00028315	2.34555	0.00860185	4.40927	0.000265982	7.36877	48.041	104.197	3494.05	45.7495	1.12647	2.74496	3.1583	2.36322	5.37062	1.73049	9.9119	1.30238	1.99188	2.8477	2.77605	1417104_at	13732	epithelial membrane protein 3
					cytoskeletal protein(PC00085)	Plek	2.98079	0.000922876	3.33781	0.00507183	4.61293	6.91486e-05	23.7408	101.394	72.5975	641.471	130.079	2.23868	0.636793	2.89196	2.3562	2.4923	2.6172	1.94058	1.26124	1.91795	2.98079	3.81796	1448749_at	56193	pleckstrin
o		actin or actin-binding cytoskeletal protein	actin and actin related protein		actin or actin-binding cytoskeletal protein(PC00041)	Arpc1b	4.51974	0.000393412	2.90945	0.00410554	2.54732	0.00241416	488.517	110.056	363.3	5987.2	10532.4	1.23269	2.82	3.79382	0.977677	3.05627	2.4479	5.05652	0.915408	1.47988	4.51974	4.383	1416226_at	11867	actin related protein 2/3 complex, subunit 1B
					actin or actin-binding cytoskeletal protein(PC00041)	Msn	4.18448	0.00398231	2.11464	0.0069831	2.35678	0.000294981	23.2216	5.19397	71.8707	100.153	28.8617	1.00666	3.41325	2.09661	1.23322	1.61393	1.01443	0.685824	0.732887	1.24596	4.18448	4.88639	1450379_at	17698	moesin
					actin or actin-binding cytoskeletal protein(PC00041)	Pdlim4	5.05392	0.000123194	2.60887	0.00363248	2.16381	0.00022986	84.0225	63.5836	3074.93	2289.18	9.18051	0.808382	2.56029	5.52057	1.9429	3.17452	4.13058	10.1915	1.87756	2.14502	5.05392	6.1545	1417928_at	30794	PDZ and LIM domain 4
			actin binding motor protein		actin binding motor protein(PC00040)	Myo1f	8.7458	0.00173868	3.42861	0.00438166	5.56635	0.00032498	11.7345	7.57962	1.55277	3559.1	5.87383	1.49791	4.08539	7.76203	0.396402	5.9411	4.27641	21.0047	1.05293	2.4005	8.7458	6.1959	1429524_at	17916	myosin IF
			non-motor actin binding protein

o		intermediate filament			intermediate filament(PC00129)	Gfap	3.68945	0.000408577	3.28215	0.00364569	3.32088	0.00114288	364.91	30.5234	13827.1	316.627	78.4683	1.18921	2.99861	29.9836	0.768542	5.64274	8.35135	8.36922	1.32105	2.83	3.68945	5.79586	1440142_s_at	14580	glial fibrillary acidic protein
					intermediate filament(PC00129)	Vim	8.92946	0.000109088	6.07086	0.00364569	5.16344	0.000771563	105.32	105.581	4557.88	4062.51	26.7167	1.21735	2.58271	4.93755	1.45488	3.76338	4.54484	7.47013	1.29447	2.53874	8.92946	11.0899	1450641_at	22352	vimentin
			intermediate filament binding protein
o		microtubule or microtubule-binding cytoskeletal protein
			microtubule binding motor protein
			non-motor microtubule binding protein		non-motor actin binding protein(PC00165)	Capg	5.75116	0.000260746	5.39453	0.00375205	5.34809	0.00465807	42.9664	57.3386	88.3068	1330.2	42.3168	2.34032	3.6713	8.42707	1.5839	2.25069	3.77239	6.02328	1.44348	2.42066	5.75116	6.39601	1450355_a_at	12332	capping protein (actin filament), gelsolin-like
			tubulin
•	defense/immunity protein				defense/immunity protein(PC00090)	Glipr1	9.3228	0.0328704	3.29171	0.00375205	6.03905	0.000237043	72.5014	260.312	29.1703	3259.9	36.6944	2.11603	4.94078	6.83825	1.87394	5.14626	4.10224	3.11095	1.02905	2.28872	9.3228	3.63694	1424927_at	73690	GLI pathogenesis-related 1 (glioma)
					defense/immunity protein(PC00090)	Glipr2	14.0349	0.000193055	3.2552	0.0195967	3.40275	0.000157035	26.3514	12.0686	73.5743	131.183	8.86174	0.648302	1.45255	0.542157	0.603475	1.67524	2.67304	3.25406	0.865146	3.8313	14.0349	3.22681	1428492_at	384009	GLI pathogenesis-related 2
					defense/immunity protein(PC00090)	Ifitm3	2.34564	0.000699151	2.76287	0.0069831	2.25569	0.00429664	170.354	201.878	1213.46	16221.8	61.098	0.668495	1.37339	1.79375	0.974851	1.35647	1.48281	4.97855	1.19773	1.3781	2.34563	2.37491	1423754_at	66141	interferon induced transmembrane protein 3
					defense/immunity protein(PC00090)	Ifitm6	2.00814	0.0373907	2.70624	0.00728584	2.27397	0.000993897	58.2004	65.9121	73.7678	9148.19	15.1699	0.474761	2.83964	3.2004	0.553489	2.10351	2.89258	3.76329	1.08866	1.30473	2.00814	2.1791	1440865_at	213002	interferon induced transmembrane protein 6
					defense/immunity protein(PC00090)	Lgals3bp	4.17767	0.000393412	4.3718	0.00801875	2.93282	0.000481385	176.861	160.634	671.542	293.257	42.6647	9.67057	1.90899	1.88104	0.954551	1.38617	1.50306	3.72964	1.02781	1.92722	4.17767	4.82857	1448380_at	19039	lectin, galactoside-binding, soluble, 3 binding protein
					defense/immunity protein(PC00090)	Mt1	3.02261	0.0114321	2.73373	0.00443154	4.18503	0.00370716	63.1451	87.006	424.328	581.769	111.628	1.29394	2.22487	3.01007	0.650113	2.58225	2.35962	2.80774	0.950903	0.812045	3.02261	4.31376	1451612_at	17748	metallothionein 1
					defense/immunity protein(PC00090)	Mt2	2.31136	0.00100769	2.05611	0.00375205	2.87566	7.49646e-05	7468.02	625.094	28845.4	3754.52	2695.2	1.0295	1.80332	6.04701	0.840866	2.51879	3.08162	6.93394	1.40847	1.44538	2.31136	3.56937	1428942_at	17750	metallothionein 2
					defense/immunity protein(PC00090)	Pycard	5.05183	0.00326849	4.00544	0.00375205	4.28146	5.41797e-05	67.4788	41.8538	92.8321	5248.76	109.348	1.57209	2.26701	4.7228	1.09591	3.79163	4.03394	7.31578	1.29965	2.38965	5.05183	3.75579	1417346_at	66824	PYD and CARD domain containing
o		antimicrobial response protein
o		complement component
o		immunoglobulin
o		immunoglobulin receptor superfamily			immunoglobulin receptor superfamily(PC00124)	AF251705	2.39652	0.00549304	3.76432	0.00363248	4.89094	8.05279e-05	80.259	117.639	89.5917	7648.24	140.345	1.62114	3.1729	3.02973	0.527799	2.64281	2.24419	6.19875	1.5111	1.63531	2.39652	3.04761	1428018_a_at	140497	cDNA sequence AF251705
					immunoglobulin receptor superfamily(PC00124)	Cd48	5.40839	0.000109088	7.35414	0.00375205	13.6301	8.05279e-05	13.5044	38.1026	29.1042	940.076	11.8146	2.86892	2.51936	2.10778	0.166293	5.02403	2.28745	22.6629	0.290924	3.01898	5.40839	7.2167	1427301_at	12506	CD48 antigen
					immunoglobulin receptor superfamily(PC00124)	Cd84	3.82518	0.000575772	6.73789	0.00375205	8.86587	3.15058e-05	13.2087	74.4822	8.72862	3355.26	17.0798	2.25239	5.22123	20.9317	1.42677	3.1516	3.25682	31.7983	1.93033	3.65361	3.82518	6.39653	1422875_at	12523	CD84 antigen
					immunoglobulin receptor superfamily(PC00124)	Cd86	3.69535	0.0216849	2.27406	0.00956985	3.93661	0.00101323	7.78801	47.9531	36.9961	3772.15	58.5808	1.31632	1.76512	3.0151	1.04932	2.32309	2.93797	4.50079	1.58419	2.34517	3.69535	3.03489	1420404_at	12524	CD86 antigen
					immunoglobulin receptor superfamily(PC00124)	Fcer1g	5.84107	0.00013629	5.28778	0.00336506	6.75818	5.91269e-05	60.914	22.4025	54.6877	5862.14	105.201	1.51034	2.02008	5.35368	1.64846	5.24879	4.131	12.7359	1.28553	3.4958	5.84107	9.95483	1418340_at	14127	Fc receptor, IgE, high affinity I, gamma polypeptide
					immunoglobulin receptor superfamily(PC00124)	Fcgr1	3.12472	0.00077814	4.05049	0.00727766	3.82528	0.000242158	25.2946	10.722	50.3794	5179.54	29.3621	1.67756	5.06185	5.4838	1.29165	2.89391	4.32907	4.93148	1.34897	2.30498	3.12472	2.98897	1417876_at	14129	Fc receptor, IgG, high affinity I
					immunoglobulin receptor superfamily(PC00124)	Fcgr2b	2.33139	0.0061677	2.92259	0.0260871	7.30368	0.000119401	40.9041	124.076	52.3137	1812.34	90.9028	1.18241	2.22811	6.25868	0.885409	2.25219	1.34652	3.91712	1.18782	1.55141	2.33139	4.13964	1442118_at	14130	Fc receptor, IgG, low affinity IIb
					immunoglobulin receptor superfamily(PC00124)	Fcgr3	3.24269	0.000248001	4.57485	0.00443154	4.86649	8.91675e-05	139.267	34.1489	33.1516	11853.5	151.03	1.24771	2.11437	6.66745	1.6246	3.72168	3.60431	11.014	1.15058	2.02235	3.24269	5.26618	1448620_at	14131	Fc receptor, IgG, low affinity III
					immunoglobulin receptor superfamily(PC00124)	Fcrls	5.45659	0.00249374	7.99458	0.00328734	6.35253	8.05279e-05	44.1504	30.9246	32.4049	8254.06	380.135	2.14211	5.01458	8.36456	1.12337	5.04832	1.90635	4.35487	1.41359	2.87558	5.45659	21.4471	1448891_at	80891	Fc receptor-like S, scavenger receptor
					immunoglobulin receptor superfamily(PC00124)	Havcr2	2.59921	0.00321799	2.78747	0.00374763	4.0272	0.00210512	32.4112	45.7107	26.5537	3259.02	60.109	1.45769	2.96978	1.84932	0.602188	5.64668	3.53448	5.60796	1.64252	1.60007	2.59921	3.76389	1451584_at	171285	hepatitis A virus cellular receptor 2
					immunoglobulin receptor superfamily(PC00124)	Lilr4b///Lilrb4a	11.9627	0.000123194	16.0995	0.00374763	32.064	8.47581e-05	7.90041	49.8749	28.1185	27221.7	70.8169	0.816718	9.9642	20.2008	0.63355	15.2815	26.8891	53.6594	1.08402	2.75874	11.9627	13.4713	1420394_s_at	14727///14728	leukocyte immunoglobulin-like receptor, subfamily B, member 4B///leukocyte immunoglobulin-like receptor, subfamily B, member 4A
					immunoglobulin receptor superfamily(PC00124)	Trem2	25.635	6.80362e-05	6.62596	0.00328734	8.57306	0.000312928	4.37531	11.3317	8.47961	1659.34	15.1007	2.95761	12.7654	7.65604	0.634408	11.7576	6.71964	12.9386	0.961479	19.7413	25.635	41.3676	1421792_s_at	83433	triggering receptor expressed on myeloid cells 2
o		major histocompatibility complex protein			major histocompatibility complex protein(PC00149)	B2m	2.61273	0.000383251	2.77067	0.0057061	2.42965	0.000285948	3209.5	1481.93	2486.11	19666.5	1201.34	1.49353	1.65289	1.91249	1.0963	2.27148	2.03976	7.31416	0.869954	1.66448	2.61273	3.24621	1449289_a_at	12010	beta-2 microglobulin
					major histocompatibility complex protein(PC00149)	H2-D1	2.83212	0.00111491	2.42494	0.0227474	4.25456	0.000265982	134.14	40.2463	66.7295	3534.6	46.0575	2.29475	1.80175	1.35476	1.44502	1.33973	1.30636	1.64073	0.722962	1.0518	2.83212	2.67688	1451683_x_at	14964	histocompatibility 2, D region locus 1
					major histocompatibility complex protein(PC00149)	H2-K1	2.05149	0.00260555	2.05898	0.0174717	3.8255	0.000153848	336.633	437.067	391.867	6500.41	373.39	2.40216	1.94653	1.55606	0.989046	1.23031	1.17913	1.55236	0.83779	1.88784	2.05149	4.29144	1451931_x_at	14972	histocompatibility 2, K1, K region
•	extracellular matrix protein				extracellular matrix protein(PC00102)	Lgals3	15.6766	0.000161076	15.4169	0.00328734	18.7636	3.15058e-05	67.2878	43.3097	145.754	11155.4	9.20734	0.980385	10.0706	290.724	1.26247	7.26238	14.4923	36.436	1.76957	6.51958	15.6766	30.2008	1426808_at	16854	lectin, galactose binding, soluble 3
o		extracellular matrix glycoprotein
o		extracellular matrix linker protein
o		extracellular matrix structural protein			extracellular matrix structural protein(PC00103)	Col12a1	2.05485	0.00143489	2.62242	0.00431475	2.37319	0.00483273	32.6255	39.7616	22.0715	18.207	9.34662	0.442676	0.362408	1.65175	1.05783	1.6543	1.2204	6.50764	1.63363	1.22864	2.05485	2.66935	1434411_at	12816	collagen, type XII, alpha 1
•	gene-specific transcriptional regulator
o	gene-specific transcriptional regulator	DNA-binding transcription factor			DNA-binding transcription factor(PC00218)	Lrrfip1	3.11429	0.00173868	2.6191	0.00561865	3.00131	0.000153848	543.872	403.188	398.084	6195.22	128.713	1.06633	1.3822	1.67046	1.20533	1.55865	1.96333	2.87546	0.979607	1.59001	3.11429	2.99578	1433842_at	16978	leucine rich repeat (in FLII) interacting protein 1
			HMG box transcription factor
			MADS box transcription factor
			SMAD-like transcription factor
			TATA-binding transcription factor
			basic helix-loop-helix transcription factor
			basic leucine zipper transcription factor		basic leucine zipper transcription factor(PC00056)	Atf3	8.89679	0.00134321	9.42422	0.00364569	7.71803	0.000265982	23.7204	212.481	1757.12	9196.51	426.65	1.66112	5.78708	5.88862	3.25567	27.5368	15.1214	24.6829	0.602047	3.86376	8.89679	16.0771	1449363_at	11910	activating transcription factor 3
					basic leucine zipper transcription factor(PC00056)	Cebpa	4.12789	0.000194032	2.27066	0.00424802	3.81585	0.00031932	19.4538	45.9917	212.832	3044.96	9.00269	1.18972	1.81905	1.08166	0.749394	3.06315	3.43535	13.5324	0.867032	1.8931	4.12789	5.02047	1418982_at	12606	CCAAT/enhancer binding protein (C/EBP), alpha
					basic leucine zipper transcription factor(PC00056)	Cebpb	3.34479	0.00139209	2.02718	0.00892377	2.30618	0.000313541	962.785	166.876	295.448	3246.61	25.283	0.895334	1.50268	4.34211	1.22739	1.40171	1.8803	2.712	0.799561	1.16635	3.34479	3.96263	1418901_at	12608	CCAAT/enhancer binding protein (C/EBP), beta
					basic leucine zipper transcription factor(PC00056)	Cebpd	10.8154	0.000368751	6.52684	0.00375205	9.24124	5.41797e-05	352.531	119.86	3457.81	4436.48	22.4885	0.579272	3.1907	9.11956	1.4863	4.78711	4.2759	13.4372	1.04688	1.56615	10.8154	14.9623	1423233_at	12609	CCAAT/enhancer binding protein (C/EBP), delta
					basic leucine zipper transcription factor(PC00056)	Fos	2.34774	0.000546669	2.32479	0.0127322	2.34071	0.000959977	2362.97	12535	34476.9	35349.5	17722.7	0.991696	1.5102	2.20283	1.53972	2.26671	1.94925	4.33699	0.911973	1.89913	2.34774	2.71701	1423100_at	14281	FBJ osteosarcoma oncogene
				CREB-related transcription factor
			helix-turn-helix transcription factor
				Lambda repressor-like transcription factor
				Trp repressor-like transcription factor
			helix-turn-helix transcription factor	homeodomain transcription factor	homeodomain transcription factor(PC00119)	Tgif1	2.30933	0.019486	2.75032	0.00966558	3.40963	0.000175759	8.62006	4.0476	75.8036	159.258	7.39217	2.40506	1.30996	20.0759	0.67165	3.64178	3.05196	4.17464	1.71668	3.30282	2.30933	2.79148	1422286_a_at	21815	TGFB-induced factor homeobox 1
				paired box transcription factor
				winged helix/forkhead transcription factor	winged helix/forkhead transcription factor(PC00246)	Irf8	5.36595	0.000109088	3.10237	0.00658517	4.0514	8.0247e-05	24.2007	20.5933	17.1057	3891.88	17.5786	1.43083	2.92461	3.68355	1.12657	8.46775	3.55218	8.86575	1.41975	2.23644	5.36595	13.3048	1448452_at	15900	interferon regulatory factor 8
			immunoglobulin fold transcription factor
				P53-like transcription factor
				Rel homology transcription factor
				Runt transcription factor
			zinc finger transcription factor
				C2H2 zinc finger transcription factor
				C4 zinc finger nuclear receptor
				C6 zinc finger transcription factor
o		transcription cofactor
•	intercellular signal molecule
o	intercellular signal molecule	cytokine			cytokine(PC00083)	Ccl3	13.379	0.00515298	28.4955	0.00388086	18.9908	5.41797e-05	3.50489	34.2763	15.3409	11399.3	251.834	2.02355	20.508	16.5736	1.93172	107.644	42.8205	33.0975	2.02364	42.312	13.379	93.4506	1419561_at	20302	chemokine (C-C motif) ligand 3
					cytokine(PC00083)	Ccl6	4.43896	0.000328363	6.63891	0.00364569	5.34563	0.00026962	15.9791	11.8758	18.5629	6932.63	26.3678	1.15322	4.50133	11.9139	3.62923	18.2455	10.6655	21.8741	0.642983	2.51935	4.43896	3.26499	1417266_at	20305	chemokine (C-C motif) ligand 6
					cytokine(PC00083)	Ccl9	2.60054	0.000778782	5.41447	0.00614614	2.72603	0.00268222	20.5611	83.2672	32.3546	5684.57	130.066	1.37755	4.24373	4.79079	0.964712	4.59741	2.85212	16.0702	0.984721	2.31125	2.60054	2.69134	1417936_at	20308	chemokine (C-C motif) ligand 9
					cytokine(PC00083)	Spp1	2.35549	0.000556019	2.00727	0.0188073	2.79362	0.000155477	16806.6	172.846	18.7392	1508.98	6.33537	16.7649	0.700316	0.800479	1.86568	0.931724	1.23296	1.48175	1.03851	1.53591	2.35549	3.02944	1449254_at	20750	secreted phosphoprotein 1
			chemokine		chemokine(PC00074)	Cxcl16	5.92583	0.00116417	14.6303	0.00956972	9.3837	0.000854527	15.8182	2.58487	8.00944	576.667	6.99946	4.34605	3.0149	85.6978	2.84245	3.93657	2.37264	6.73239	1.1792	1.36505	5.92583	6.42846	1449195_s_at	66102	chemokine (C-X-C motif) ligand 16
			interferon superfamily
			interleukin superfamily
o		growth factor			growth factor(PC00112)	Cyr61	3.7523	0.000778782	5.15892	0.00776088	5.37927	0.00187172	7.15789	514.663	6461.3	391.822	19.5739	0.585616	1.33868	3.60735	0.496654	2.96956	4.90025	12.2521	0.739115	2.00282	3.7523	9.37378	1438133_a_at	16007	cysteine rich protein 61
					growth factor(PC00112)	Fgf2	2.46709	0.00408677	2.14698	0.00468248	2.75793	0.000742491	28.1925	129.828	650.716	317.258	31.6434	1.24225	1.40107	1.97402	1.07395	1.96296	1.98061	3.17005	0.9823	1.52899	2.46709	2.11411	1456945_at	14173	fibroblast growth factor 2
					growth factor(PC00112)	Hbegf	4.61161	0.000123194	2.75801	0.0066246	2.51942	0.000869221	368.835	295.449	3097.59	857.411	230.655	1.05393	1.47882	5.19611	1.06758	2.60256	2.3362	8.99514	0.764847	1.63894	4.61161	7.87561	1418350_at	15200	heparin-binding EGF-like growth factor
					growth factor(PC00112)	Igf1	2.39404	0.00278533	2.71004	0.00438166	2.27135	0.0175301	13.4896	1887.17	158.101	128.177	4.70452	10.9402	0.645892	2.83151	0.805343	1.78832	0.905031	2.89082	1.06235	1.2542	2.39404	2.40827	1434413_at	16000	insulin-like growth factor 1
			neurotrophic factor
o		membrane-bound signaling molecule			membrane-bound signaling molecule(PC00152)	Gpnmb	14.171	0.000234331	8.27163	0.00555739	66.1569	3.15058e-05	16.8933	35.2203	126.712	67.8877	21.3062	14.7357	10.7058	14.0357	1.85344	8.72486	11.848	34.7146	1.55983	11.0847	14.171	26.7748	1448303_at	93695	glycoprotein (transmembrane) nmb
o		peptide hormone
			neuropeptide
•	membrane traffic protein				membrane traffic protein(PC00150)	Tnfaip2	2.41021	0.0193522	2.23475	0.0305292	2.56842	0.000604224	82.8261	35.9696	108.189	7234.6	44.5645	0.532716	1.36843	3.20835	2.06924	1.99096	2.89604	6.85501	0.27548	1.09223	2.41021	2.32653	1438855_x_at	21928	tumor necrosis factor, alpha-induced protein 2
o		SNARE protein
o		membrane trafficking regulatory protein			membrane trafficking regulatory protein(PC00151)	Cd68	8.13853	0.000129565	7.8482	0.00363248	12.3512	3.15058e-05	46.6036	134.069	51.7169	4869.51	127.563	2.7222	5.5221	8.47394	1.34354	6.17278	10.0407	21.3658	1.06485	2.89304	8.13853	9.2466	1449164_at	12514	CD68 antigen
					membrane trafficking regulatory protein(PC00151)	Syngr1	2.81368	0.000455906	2.18409	0.00613697	2.42884	0.00039369	200.129	319.385	450.348	2123.99	649.938	3.80418	2.85598	3.71947	0.964891	1.72666	2.39621	5.73244	0.817801	1.64045	2.81368	2.87891	1419289_a_at	20972	synaptogyrin 1
o		vesicle coat protein
•	metabolite interconversion enzyme
o	metabolite interconversion enzyme	hydrolase			hydrolase(PC00121)	Sulf1	2.49214	0.00117656	2.07407	0.00424942	2.38001	0.000206371	43.2392	1454.86	180.969	58.9239	19.6392	0.406634	2.9835	4.22793	0.918013	4.2144	3.52419	8.54108	1.38213	1.44988	2.49214	2.9504	1438200_at	240725	sulfatase 1
			amylase
			deacetylase
			deaminase
			esterase
			galactosidase
			glucosidase
			glycosidase		glycosidase(PC00110)	Hexa	2.92017	0.000224874	2.04572	0.00561865	2.62044	0.000139649	2449.58	2380.5	6378.7	28833.1	4009.64	1.20365	2.33737	2.90374	0.904309	2.04856	1.8	4.21925	1.1193	1.59242	2.92017	2.61266	1449024_a_at	15211	hexosaminidase A
					glycosidase(PC00110)	Hexb	4.62225	0.000123194	2.86508	0.00364569	3.51438	5.41797e-05	1263.52	360.371	719.164	40347	1229.66	1.10534	2.98325	2.33254	1.01514	3.17503	2.85842	7.74321	1.11423	2.32416	4.62225	4.91596	1460180_at	15212	hexosaminidase B
					glycosidase(PC00110)	Lyz1	21.8834	0.000109088	40.8196	0.00328734	125.23	6.91486e-05	93.8285	4.87474	31.3901	22529.2	43.9178	1.97727	9.98428	61.8956	1.0374	9.05655	6.07105	67.4101	1.12436	6.29045	21.8834	23.7438	1439426_x_at	17110	lysozyme 1
					glycosidase(PC00110)	Lyz2	12.2414	0.000109088	11.7173	0.00363248	41.5707	0.000155477	69.2852	55.3778	55.8564	23028.8	56.262	0.955251	6.53464	12.4928	0.698929	6.06358	3.19362	23.3374	1.1076	4.57828	12.2414	16.6836	1423547_at	17105	lysozyme 2
			lipase		lipase(PC00143)	Lpl	6.96836	0.000393412	7.81244	0.00352223	11.1237	3.15058e-05	5	4552	190	3800	83	7.6	6.4	59.7	1.4	12.1	14.3	31.5	1.2	2.6	7	4.3	1415904_at	16956	lipoprotein lipase
				phospholipase	phospholipase(PC00186)	Pld4	2.15945	0.00261457	2.00849	0.0226726	2.47515	0.000285948	32.5674	69.9161	29.4507	9407.91	37.6679	1.49956	2.84855	5.38056	1.8974	4.81022	3.12523	5.71978	0.926836	1.58419	2.15945	2.37827	1433678_at	104759	phospholipase D family, member 4
			phosphatase
				carbohydrate phosphatase
				nucleotide phosphatase
			phosphodiesterase
			pyrophosphatase
o		isomerase
			epimerase/racemase
			mutase
o		ligase
o		lyase
			aldolase
			cyclase
				adenylate cyclase
				guanylate cyclase
			decarboxylase
		lyase	dehydratase		dehydratase(PC00091)	Hacd4	2.93186	0.000249069	2.21886	0.0066246	3.31334	0.0213461	19.7649	55.1413	471.313	2648.83	17.519	1.3353	1.15874	1.83794	1.36107	2.39129	1.09237	6.04407	0.934911	1.71253	2.93186	2.76568	1450967_at	66775	3-hydroxyacyl-CoA dehydratase 4
			hydratase
o		oxidoreductase
		oxidoreductase	dehydrogenase		dehydrogenase(PC00092)	Dhrs1	5.46859	0.000109088	3.95955	0.00375205	3.39966	0.000159792	2383.34	1545.72	5800.07	376.972	1515.74	1.09207	2.64914	2.9522	1.31174	1.59067	2.01707	3.51914	0.92223	2.32798	5.46859	6.06322	1415677_at	52585	dehydrogenase/reductase (SDR family) member 1
					dehydrogenase(PC00092)	Hpgd	6.32287	0.000129565	4.35633	0.0066246	3.34478	9.4013e-05	357.981	195.304	84.1906	6859.75	130.669	0.979218	1.6282	3.76396	1.5324	4.75913	9.67554	14.2931	1.13979	2.198	6.32287	6.51813	1419905_s_at	15446	hydroxyprostaglandin dehydrogenase 15 (NAD)
			hydroxylase
			oxidase		oxidase(PC00175)	Ch25h	9.82505	0.00406995	6.94157	0.00328734	13.8806	0.00377589	20.4966	91.5015	36.4208	700.288	27.9238	8.23094	2.82172	8.0271	1.22188	6.1948	5.34885	22.9308	1.04231	2.57488	9.82505	5.78783	1449227_at	12642	cholesterol 25-hydroxylase
					oxidase(PC00175)	Cybb	3.32016	0.000683654	6.9391	0.00364569	19.5723	0.000742491	19.6464	16.8507	18.0625	6029.73	37.7858	1.10102	3.77659	6.01971	3.42576	9.55348	4.57661	15.5617	0.812987	2.07952	3.32016	4.94903	1436778_at	13058	cytochrome b-245, beta polypeptide
			oxygenase		oxygenase(PC00177)	Hmox1	13.9967	0.000161076	2.9548	0.00652651	3.12159	0.00268222	44.0496	4.31455	167.522	729.364	83.3467	1.63146	1.64629	7.52446	1.11098	3.29212	4.83222	8.24879	0.370656	1.42957	13.9967	10.3658	1448239_at	15368	heme oxygenase 1
			peroxidase		peroxidase(PC00180)	LOC102642619///Prdx6	3.66379	0.000186311	2.25791	0.00613697	2.28226	0.000113221	1745.26	557.731	14529.1	1212.25	3097.61	0.692961	1.90727	4.03048	1.01652	1.80593	2.55808	4.18443	0.95448	1.71039	3.66379	4.42201	1423223_a_at	11758///102642619	peroxiredoxin-6///peroxiredoxin 6
			reductase		reductase(PC00198)	Ifi30	2.59992	0.000397296	4.10646	0.0159573	5.12943	0.000155477	222.324	221.232	341.424	9410.02	134.576	1.47066	2.0481	3.38187	1.52182	1.76666	1.80701	5.24441	1.14566	1.83699	2.59992	4.82247	1422476_at	65972	interferon gamma inducible protein 30
					reductase(PC00198)	Rrm2	4.34623	0.00361707	2.32228	0.0068906	2.47818	0.000869221	89.4818	192.927	692.73	2175.2	12.6436	0.85582	2.54525	3.00679	1.06976	4.0715	3.28857	14.5231	0.940955	1.87679	4.34623	3.56754	1434437_x_at	20135	ribonucleotide reductase M2
o		transferase			transferase(PC00220)	Tgm1	4.06611	0.000778782	7.6929	0.00851983	11.1852	0.000206558	32.6868	37.6584	29.7825	100.942	66.2845	0.747137	3.89342	14.2139	1.07174	10.7414	14.834	25.0525	0.866621	1.79782	4.06611	5.56013	1451416_a_at	21816	transglutaminase 1, K polypeptide
			acetyltransferase
			acyltransferase
			glycosyltransferase		glycosyltransferase(PC00111)	Galnt15	2.2967	0.00132918	2.18189	0.00892377	2.80708	0.000319062	17.4566	85.9961	106.686	13.4504	14.0779	0.663784	1.50117	1.89168	0.274314	1.89575	1.60067	2.61845	1.78282	1.40379	2.2967	5.27803	1429236_at	78754	UDP-N-acetyl-alpha-D-galactosamine:polypeptide N-acetylgalactosaminyltransferase 15
					glycosyltransferase(PC00111)	Ggta1	4.50976	0.000513432	2.98258	0.0103529	3.90628	0.00161044	22.7154	29.6576	533.807	1493.25	37.2379	0.645002	1.30211	1.97115	1.1586	2.87591	2.44753	8.35219	1.5004	1.55396	4.50976	4.97947	1418483_a_at	14594	glycoprotein galactosyltransferase alpha 1, 3
					glycosyltransferase(PC00111)	Ugt1a1///Ugt1a10///Ugt1a2///Ugt1a5///Ugt1a6a///Ugt1a6b///Ugt1a7c///Ugt1a9	2.84699	0.00112177	2.64151	0.00801875	3.33371	0.00264984	8.66486	120.799	532.464	5148.39	51.8698	0.985139	3.06956	1.38263	1.35843	5.17834	5.55208	8.45952	1.43203	1.53961	2.84699	2.97429	1424783_a_at	22236///94284///394430///394432///394433///394434///394435///394436	UDP glucuronosyltransferase 1 family, polypeptide A1///UDP glycosyltransferase 1 family, polypeptide A10///UDP glucuronosyltransferase 1 family, polypeptide A2///UDP glucuronosyltransferase 1 family, polypeptide A5///UDP glucuronosyltransferase 1 family, polypeptide A6A///UDP glucuronosyltransferase 1 family, polypeptide A6B///UDP glucuronosyltransferase 1 family, polypeptide A7C///UDP glucuronos…
			kinase
				amino acid kinase
				carbohydrate kinase
				nucleotide kinase
			methyltransferase
			nucleotidyltransferase
			transaldolase
			transaminase		transaminase(PC00216)	Gfpt2	2.00951	0.00903086	2.19252	0.00785741	2.3854	0.00108799	73.6113	330.966	464.325	153.608	396.393	0.769998	1.31798	2.34338	0.836286	2.05355	2.02054	3.74429	0.986125	1.47313	2.00951	1.80574	1418753_at	14584	glutamine fructose-6-phosphate transaminase 2
			transketolase
•	protein modifying enzyme
o	protein modifying enzyme	non-receptor serine/threonine protein kinase			non-receptor serine/threonine protein kinase(PC00167)	Pbk	2.3	0.005016	3	0.018665	4	0.00111	34.6432	129.054	182.85	644.306	20.6852	1.64078	1.05883	5.75416	1.19491	7.57389	5.01819	11.8089	1.26456	1.83346	2.32706	4.10271	1448627_s_at	52033	PDZ binding kinase
o		non-receptor tyrosine protein kinase
o		protease			protease(PC00190)	Aspg	6.56962	0.000560979	3.85878	0.00424802	4.67363	6.34771e-05	14.9158	108.866	458.102	11.8066	14.4472	1.07287	2.62049	17.1732	3.04033	5.22118	4.96178	4.5001	0.475057	2.9892	6.56962	8.46141	1435036_at	104816	asparaginase homolog (S. cerevisiae)
					protease(PC00190)	Casp12	2.94169	0.000887193	3.27004	0.0066246	3.44082	0.000285948	109.555	78.2874	21.89	56.9944	46.1496	1.11795	2.23673	3.1114	1.59027	2.29452	2.52583	3.60647	1.31028	1.22171	2.94169	3.09944	1449297_at	12364	caspase 12
					protease(PC00190)	Psmb8	3.70648	0.000400875	2.62756	0.00851983	3.09571	0.00101323	11.3201	6.36681	31.7431	1704.7	14.7712	1.38767	2.25099	3.45283	3.45355	1.52189	2.73612	4.67369	1.31558	1.95027	3.70648	2.92031	1422962_a_at	16913	proteasome (prosome, macropain) subunit, beta type 8 (large multifunctional peptidase 7)
			aspartic protease		aspartic protease(PC00053)	Ctsd	3.73389	0.000123194	2.77112	0.00364569	3.7965	5.41797e-05	8980.57	4738.94	9855.81	25358.4	5994.28	1.45065	2.68318	3.94356	1.17896	1.62113	2.11309	4.3364	1.15327	1.79748	3.73389	3.35795	1448118_a_at	13033	cathepsin D
			cysteine protease		cysteine protease(PC00081)	Ctsc	3.36094	0.000664896	3.66277	0.00555739	3.95038	0.000311467	51.4416	225.043	3273.86	24350.6	347.333	1.134	1.8204	3.17248	1.28406	5.6374	3.40272	12.1967	0.838092	2.07444	3.36094	3.58285	1416382_at	13032	cathepsin C
					cysteine protease(PC00081)	Ctsh	4.64453	0.000393412	3.51299	0.00424942	4.15402	0.000237043	79.6986	91.4183	173.655	11096.2	110.424	1.69315	2.78638	4.42255	1.14853	2.80159	1.98214	15.7197	0.803701	1.73424	4.64453	6.03885	1418365_at	13036	cathepsin H
					cysteine protease(PC00081)	Ctsl	2.43042	0.00266521	2.29774	0.0072713	2.15953	0.000322711	3042.65	6674	17155.6	11913.3	20456.4	2.19947	1.90547	1.66052	0.953793	1.33923	1.17006	2.32188	1.2272	1.30654	2.43042	3.08701	1451310_a_at	13039	cathepsin L
					cysteine protease(PC00081)	Ctss	4.18949	0.000123194	3.07179	0.00364569	3.59585	5.41797e-05	1361.84	117.588	128.225	58114.8	2049.37	0.936731	2.38534	3.51088	1.06238	3.06174	3.15562	10.576	1.10386	2.12372	4.18949	4.60989	1448591_at	13040	cathepsin S
					cysteine protease(PC00081)	Ctsz	5.3422	0.000109088	3.1227	0.00364569	4.19319	8.05279e-05	536.238	651.625	2578.36	11130	1863.21	2.61517	3.66239	7.08472	1.73299	2.22194	1.9628	6.19854	1.06498	2.10482	5.3422	5.2525	1417868_a_at	64138	cathepsin Z
			metalloprotease				5.3422	0.000109088	3.1227	0.00364569	4.19319	8.05279e-05
			serine protease		serine protease(PC00203)	Cela1	2.2	0.003694	2.1	0.007278	2.8	9.6e-05	1965.27	198.977	80.8284	271.961	1187.22	1.19037	1.85181	3.19876	1.33297	1.13447	1.36387	1.39682	1.12839	1.41276	2.20695	2.14456	1423693_at	109901	chymotrypsin-like elastase family, member 1
					serine protease(PC00203)	Klk6	2.5	0.001022	2	0.006677	2.5	0.00084	189.435	102.11	50.2176	386.464	1670.39	1.13247	1.36264	3.46629	0.674662	1.19622	2.04872	4.81636	0.833249	1.2996	2.5388	2.37812	1448982_at	19144	kallikrein related-peptidase 6
					serine protease(PC00203)	Plat	2.7	0.000904	2.1	0.013748	2.5	0.00067	450.781	655.901	1398.79	81.0911	19735	0.87057	1.41569	2.08915	1.07762	1.55241	2.02949	3.63229	0.925909	1.50799	2.68249	4.19764	1415806_at	18791	plasminogen activator, tissue
o		protein phosphatase			protein phosphatase(PC00195)	Ptprc	3.7	0.000341	5.5	0.003881	6.7	3.2e-05	100.315	105.174	36.2596	28114.7	97.7411	0.774311	4.89108	6.08925	1.85517	8.0399	6.29284	15.5662	0.741451	2.09762	3.67317	4.07126	1422124_a_at	19264	protein tyrosine phosphatase, receptor type, C
o		ubiquitin-protein ligase			ubiquitin-protein ligase(PC00234)	Trim30a	2.6	0.003885	2.6	0.007761	2.5	0.000625	33.4082	3.84598	39.1894	990.637	15.3366	1.12269	1.72049	2.60197	4.06424	2.66629	1.9299	4.12949	1.88693	0.818331	2.60092	2.53885	1451860_a_at	20128	tripartite motif-containing 30A
•	protein-binding activity modulator
o		G-protein
	protein-binding activity modulator	G-protein	heterotrimeric G-protein		heterotrimeric G-protein(PC00117)	Gbp2	2.4095	0.00413141	4.71296	0.00956972	2.182	0.0136067	2.97332	8.00535	103.66	330.371	14.3063	2.06525	2.69159	1.34227	1.58764	2.02127	1.79815	4.60346	0.84806	1.55784	2.4095	2.4727	1418240_at	14469	guanylate binding protein 2
			small GTPase		small GTPase(PC00208)	Rab29	2.89554	0.000560979	2.6678	0.00777186	2.83446	0.000155477	309.741	200.189	1128.24	772.025	609.414	1.27361	1.56248	4.20005	1.08694	2.35171	2.66484	5.38874	0.922143	1.55118	2.89554	3.17152	1451362_at	226422	RAB29, member RAS oncogene family
					small GTPase(PC00208)	Rab32	2.75841	0.00571093	2.70536	0.00658517	3.07851	0.000742491	62.7437	15.6896	93.1191	668.188	225.584	0.905835	2.67927	1.79668	1.44785	1.16715	1.43046	2.35645	0.945548	1.73587	2.75841	7.93896	1416527_at	67844	RAB32, member RAS oncogene family
					small GTPase(PC00208)	Rhoj	3.08294	0.00443586	2.86051	0.0335094	2.67294	0.00428816	25.8466	89.5003	340.644	87.7948	28.1669	0.957237	3.20507	4.24619	0.809532	2.91588	2.18836	11.5746	1.11686	1.6747	3.08294	6.75297	1418892_at	80837	ras homolog gene family, member J
o		G-protein modulator			G-protein modulator(PC00022)	Arhgdib	2.24323	0.00192391	2.95242	0.00507183	2.83581	0.000156803	56.4175	214.678	16.2177	7018.07	81.2453	0.998035	1.50846	5.42767	0.418912	3.5789	1.76205	5.8324	1.23545	1.72562	2.24323	2.04406	1426454_at	11857	Rho, GDP dissociation inhibitor (GDI) beta
			GTPase-activating protein		GTPase-activating protein(PC00257)	Arhgap25	2.18269	0.0061677	3.14185	0.00375205	4.45622	0.000423969	42.7469	413.982	43.3387	3642.19	70.1728	1.5362	4.13687	2.8816	0.665856	2.17319	2.39437	3.8166	0.60198	1.51952	2.18269	2.98696	1437072_at	232201	Rho GTPase activating protein 25
					GTPase-activating protein(PC00257)	Rgs20	4.13341	0.00112177	2.47657	0.00375205	2.7279	0.00204439	223.902	571.573	8191.9	10.6731	161.523	1.8604	3.71285	2.51995	0.922536	2.80687	3.31736	6.40282	2.64183	2.12233	4.13341	3.06275	1443694_at	58175	regulator of G-protein signaling 20
			guanyl-nucleotide exchange factor		guanyl-nucleotide exchange factor(PC00113)	Dock2	12.511	0.00222312	3.04335	0.00614614	3.57008	0.000610375	117.952	14.9464	24.106	3219.34	40.8508	1.28902	5.5092	3.42413	1.65815	2.12362	3.10242	13.5598	0.511797	2.68526	12.511	9.59446	1422808_s_at	94176	dedicator of cyto-kinesis 2
o		kinase modulator			kinase modulator(PC00140)	Socs3	9.94583	0.000543212	10.5595	0.00948266	6.75143	0.000206466	101.509	156.508	2093.32	17103.2	661.702	0.694502	7.70486	15.7613	2.35681	15.1015	12.723	61.4546	1.45156	1.95871	9.94583	9.04714	1455899_x_at	12702	suppressor of cytokine signaling 3
			kinase activator
			kinase inhibitor
o		phosphatase modulator
			phosphatase activator
			phosphatase inhibitor
o		protease inhibitor			protease inhibitor(PC00191)	A2m	4.69114	0.000234331	3.95473	0.00443154	3.72753	0.000175759	113.314	146.697	1041.3	132.774	25.91	0.737912	4.07355	23.7806	0.66975	1.71006	2.87546	2.82611	1.37529	2.15087	4.69114	6.06303	1434719_at	232345	alpha-2-macroglobulin
					protease inhibitor(PC00191)	C3	4.80523	0.000606649	3.47745	0.00658517	5.52435	5.41797e-05	106.034	5.58902	12.8556	1601.82	4.62857	0.742782	1.39611	58.2332	1.29692	1.427	2.44601	7.16784	1.0273	2.42901	4.80523	6.29462	1423954_at	12266	complement component 3
					protease inhibitor(PC00191)	C4b///LOC102643089	3.28518	0.000575001	4.29042	0.00363248	4.9121	4.46471e-05	138.295	183.107	6081.64	1742.63	161.505	1.34755	6.82205	33.3441	0.711297	5.39813	6.4448	11.1385	1.22553	1.55629	3.28518	2.60997	1418021_at	12268///102643089	complement component 4B (Chido blood group)///complement C4-B
					protease inhibitor(PC00191)	Cd109	5.88602	0.0143377	10.3009	0.0125716	6.58176	0.000264195	6.74101	30.0456	9.16396	5.30813	17.817	1.93391	1.69333	3.01985	1.14855	7.80747	6.21251	8.54354	0.723887	7.86203	5.88602	16.4075	1425658_at	235505	CD109 antigen
					protease inhibitor(PC00191)	Igfbp5	2.00691	0.00853071	2.89543	0.0066246	2.73094	0.00579378	186.018	947.603	7839.73	172.23	76.8632	1.76784	2.36614	13.898	1.2352	2.14288	2.71718	5.32007	0.80717	1.40313	2.00691	2.0747	1452114_s_at	16011	insulin-like growth factor binding protein 5
					protease inhibitor(PC00191)	Serpina3n	15.5209	0.000109088	12.0119	0.00364569	12.6366	4.45399e-05	1501.69	926.283	2059.33	11.1708	12.6461	1.69469	3.98008	8.77144	0.668485	2.0826	4.0902	8.1581	1.02009	4.08694	15.5209	27.6158	1419100_at	20716	serine (or cysteine) peptidase inhibitor, clade A, member 3N
					protease inhibitor(PC00191)	Timp1	7.94029	0.000476964	14.3423	0.00374763	14.2217	5.41797e-05	23.3293	90.2627	75.7015	89.9938	38.0213	0.862071	35.456	17.0142	1.71017	12.7101	28.2359	30.0662	0.855995	5.58368	7.94029	17.8088	1460227_at	21857	tissue inhibitor of metalloproteinase 1
•	scaffold/adaptor protein				scaffold/adaptor protein(PC00226)	Blnk	4.07893	0.0198761	4.06853	0.00364569	5.37397	0.00011446	34.0071	338.459	24.4935	3002.06	44.9228	1.62543	5.67688	4.63963	1.61509	4.24573	2.23832	6.01558	1.05381	1.71852	4.07893	3.71072	1451780_at	17060	B cell linker
					scaffold/adaptor protein(PC00226)	C1qa	6.1537	0.000109088	5.28823	0.00375205	7.05361	3.15058e-05	119.42	9.28239	11.0116	33607.8	335.102	1.27139	4.84806	6.69075	1.67923	5.3535	4.11041	23.3694	0.990616	2.71962	6.1537	7.09348	1417381_at	12259	complement component 1, q subcomponent, alpha polypeptide
					scaffold/adaptor protein(PC00226)	C1qb	8.27717	0.000111644	4.57189	0.00364569	4.7221	7.49646e-05	39.3291	5.40785	14.5018	19845.9	421.566	1.69675	4.66186	8.40499	0.69071	8.4286	6.85806	34.0579	0.851292	3.47207	8.27717	9.14853	1417063_at	12260	complement component 1, q subcomponent, beta polypeptide
					scaffold/adaptor protein(PC00226)	C1qc	12.634	0.000114525	5.31323	0.00364569	6.15482	5.41797e-05	86.1699	7.65677	5.36914	25004	318.192	1.46607	5.41013	7.93596	0.829648	5.64166	6.6875	27.4234	0.839666	4.02732	12.634	12.4888	1449401_at	12262	complement component 1, q subcomponent, C chain
					scaffold/adaptor protein(PC00226)	Cd53	4.00418	0.000129565	2.88385	0.00457364	3.98606	9.1937e-05	77.883	5.23473	12.4715	8625.62	128.424	0.991448	1.48639	2.8161	0.973335	4.58942	4.16697	7.01697	1.19598	2.36175	4.00418	4.7577	1448617_at	12508	CD53 antigen
					scaffold/adaptor protein(PC00226)	Cd9	2.88187	0.000215705	3.93608	0.00363248	3.28268	0.00171874	158.281	159.928	4717.44	2545.13	11745.9	3.60545	2.34245	4.30018	1.22181	2.66393	3.29597	6.60025	1.35063	1.55382	2.88187	2.78318	1416066_at	12527	CD9 antigen
					scaffold/adaptor protein(PC00226)	Fyb	5.51447	0.00188571	4.09279	0.00443154	3.90547	0.000175759	41.4271	18.1956	30.4604	4865.38	114.175	1.31618	2.28012	4.96247	1.00167	5.03571	3.206	15.6361	1.18988	2.96522	5.51447	5.70625	1435144_at	23880	FYN binding protein
					scaffold/adaptor protein(PC00226)	Klhl6	13.4044	0.0011771	4.51932	0.0116269	3.35149	0.00210512	4.89421	57.6461	20.2432	2763.26	42.9367	1.79067	3.17237	2.75625	2.54474	4.33103	9.29414	12.8804	2.19991	3.18728	13.4044	5.99022	1437886_at	239743	kelch-like 6
					scaffold/adaptor protein(PC00226)	Tyrobp	9.26552	6.80362e-05	6.72866	0.00336506	8.55456	3.15058e-05	248.212	51.9757	60.5711	26061.5	261.617	1.50629	4.7153	12.9187	0.977647	8.22531	7.27787	31.6589	0.932921	3.76522	9.26551	10.1204	1450792_at	22177	TYRO protein tyrosine kinase binding protein
•	storage protein				storage protein(PC00210)	Ftl1///Ftl2-ps///LOC100862446	2.41334	0.000463134	2.01437	0.00671018	2.50313	8.05279e-05	1571.7	2984.77	3806.85	12857.4	8894.34	1.55018	2.45212	5.16766	1.07353	1.84079	1.63771	2.9498	1.18164	1.19788	2.41334	1.98363	1422302_s_at	14325///14337///100862446	ferritin light polypeptide 1///ferritin light polypeptide 2, pseudogene///ferritin light chain 1
•	structural protein				structural protein(PC00211)	Chl1	3.11605	0.0033394	2.15509	0.0348287	2.40611	0.000495539	95.3617	711.398	205.391	27.2954	9.09344	0.412908	1.77597	2.21109	0.692833	2.38989	2.30673	3.12148	0.966537	1.70433	3.11605	4.78757	1417795_at	12661	cell adhesion molecule with homology to L1CAM
					structural protein(PC00211)	Olfml3	2.16194	0.0077498	2.88324	0.00736655	2.10728	0.0126697	24.6569	35.5816	58.6453	12370.5	189.734	1.14924	2.16046	3.67667	1.11081	2.93141	3.18131	10.8411	1.14969	1.53706	2.16194	3.22538	1448475_at	99543	olfactomedin-like 3
o		myelin protein
o		surfactant
•	transfer/carrier protein				transfer/carrier protein(PC00219)	Fabp7	2.94446	0.00043833	2.23296	0.00965019	2.04609	0.000518499	403.324	202.567	27466.7	181.326	1907.79	0.440586	1.45819	5.86917	0.794307	1.85426	2.36031	4.29505	1.26196	1.29385	2.94446	2.17735	1450779_at	12140	fatty acid binding protein 7, brain
					transfer/carrier protein(PC00219)	Rbp1	4.04974	0.000229637	5.0237	0.00364569	3.29778	0.000975844	8.55936	138.69	558.074	42.1515	54.879	0.892533	3.41323	4.98028	1.34764	3.64303	2.25024	8.39796	1.17443	1.96058	4.04974	3.23931	1448754_at	19659	retinol binding protein 1, cellular
o		apolipoprotein
o		globin
•	translational protein
o		aminoacyl-tRNA synthetase
o		ribosomal protein
o		translation factor
			translation elongation factor
	translational protein	translation factor	translation initiation factor		translation initiation factor(PC00224)	Eif4ebp1	2.54145	0.00254337	2.11047	0.00814982	3.04397	0.000302408	231.935	136.726	841.957	2713.53	17.8487	0.848009	1.68189	12.8147	1.17693	1.78522	2.72855	11.1484	0.943802	1.3915	2.54145	4.72376	1434976_x_at	13685	eukaryotic translation initiation factor 4E binding protein 1
			translation release factor
•	transmembrane signal receptor				transmembrane signal receptor(PC00197)	Axl	2.50167	0.000488176	2.30159	0.00546954	2.34673	0.000843224	49.9794	51.6959	2598.26	305.114	44.8575	7.64454	1.79093	1.47771	0.838326	1.53806	1.93948	2.2338	0.911559	1.8471	2.50167	3.79865	1423586_at	26362	AXL receptor tyrosine kinase
					transmembrane signal receptor(PC00197)	Cd14	3.14595	0.000659277	3.45866	0.00364569	3.9167	0.000175759	9.23391	91.166	254.037	19571.5	235.275	1.29088	3.62493	3.66341	0.53618	4.19523	5.62426	11.0172	0.375367	1.61794	3.14595	5.53588	1417268_at	12475	CD14 antigen
					transmembrane signal receptor(PC00197)	Cd200r4	6.28223	0.00104865	13.9901	0.00667705	31.2088	0.000153848	12.7352	1.20694	17.4182	105.234	11.0752	3.18991	4.33803	13.0784	1.91851	6.81927	5.86068	13.5101	1.06916	4.483	6.28223	3.58445	1435313_at	239849	CD200 receptor 4
					transmembrane signal receptor(PC00197)	Cd44	4.99546	0.00028342	3.5018	0.00443154	4.02117	0.000150829	11.388	156.601	1174.64	5430.51	25.5168	0.741212	2.39083	7.833	0.845299	6.36501	7.60583	16.3623	1.09041	1.97706	4.99546	6.03529	1423760_at	12505	CD44 antigen
					transmembrane signal receptor(PC00197)	Csf1r	2.48192	0.000778782	2.41811	0.00431475	2.15554	0.000285948	1070.74	335.545	222.87	47349.9	4203.56	0.973595	2.12736	4.23735	0.983794	3.24164	3.34368	10.269	1.07586	1.72135	2.48193	2.75897	1419872_at	12978	colony stimulating factor 1 receptor
					transmembrane signal receptor(PC00197)	Csf2rb	2.89907	0.000807915	4.51975	0.00671018	4.11582	0.00276888	20.0876	50.7041	34.994	4539.95	45.6604	1.13407	1.83363	8.18107	1.13792	3.09908	4.2748	8.79633	0.979177	2.84376	2.89907	3.64572	1455660_at	12983	colony stimulating factor 2 receptor, beta, low-affinity (granulocyte-macrophage)
					transmembrane signal receptor(PC00197)	Csf3r	4.79256	0.00277904	3.45033	0.00431475	4.33446	9.7225e-05	49.7253	37.1425	35.5511	7691.77	66.9222	1.08461	3.69576	3.00324	0.863994	3.23754	2.02329	11.4357	0.547888	2.32919	4.79256	2.34743	1418806_at	12986	colony stimulating factor 3 receptor (granulocyte)
					transmembrane signal receptor(PC00197)	Il2rg	3.82967	0.000926438	7.8254	0.00375205	4.24716	0.00268222	4.74013	9.19365	17.5914	2839.06	8.5396	2.08875	1.58694	2.50375	4.2764	1.71166	1.45933	9.00593	0.457282	1.96939	3.82967	3.93323	1416295_a_at	16186	interleukin 2 receptor, gamma chain
					transmembrane signal receptor(PC00197)	Met	3.22673	0.00139823	3.17466	0.00364569	3.29274	0.00161044	7.12128	1024.86	14.3277	187.521	5.21709	0.744138	2.41217	3.23885	2.33269	1.7925	2.08014	3.35036	0.889409	1.58348	3.22673	4.80096	1434447_at	17295	met proto-oncogene
					transmembrane signal receptor(PC00197)	Osmr	4.50406	0.00018492	4.87564	0.00424942	5.77307	0.000206558	33.6394	25.4392	1360.88	65.4626	3.17477	0.670668	2.49333	5.81482	1.11531	3.03707	6.33001	18.6141	1.08582	1.92257	4.50406	6.45605	1418674_at	18414	oncostatin M receptor
					transmembrane signal receptor(PC00197)	Tlr13	2.07179	0.0091301	2.84074	0.0119907	3.22427	0.000653506	37.9877	51.0607	34.7225	2575.58	55.8957	1.13821	2.83538	6.30017	1.87537	2.09813	2.21048	7.42375	1.10294	1.50027	2.07179	2.60083	1457753_at	279572	toll-like receptor 13
					transmembrane signal receptor(PC00197)	Tlr2	2.71786	0.00140805	3.73284	0.00507183	5.28551	3.15058e-05	61.7521	106.638	57.4626	4719.36	80.6478	2.83644	3.09357	3.73398	0.606472	2.69001	2.0476	3.46367	1.08025	1.80121	2.71786	4.08854	1419132_at	24088	toll-like receptor 2
					transmembrane signal receptor(PC00197)	Tnfrsf12a	3.83668	0.000393412	2.32586	0.00845771	2.76918	0.000313541	1034	188.027	110.41	146.377	65.9991	2.05365	1.87165	2.25193	1.19583	1.33713	1.47703	1.64655	1.12469	2.57904	3.83668	5.90736	1418572_x_at	27279	tumor necrosis factor receptor superfamily, member 12a
o		G-protein coupled receptor			G-protein coupled receptor(PC00021)	Adgre1	2.16462	0.000583557	2.01246	0.00375205	2.3704	0.00045987	60.6831	109.035	116.633	3724.53	247.319	1.29582	1.5522	2.45167	1.10619	3.91113	2.49862	5.54117	0.702814	1.49582	2.16462	2.25089	1451161_a_at	13733	adhesion G protein-coupled receptor E1
					G-protein coupled receptor(PC00021)	C3ar1	8.94868	0.00322689	7.41209	0.00375205	7.49364	0.000319062	18.3055	33.5851	8.51112	5307.41	25.851	1.88268	3.17482	9.55987	0.608544	11.3096	10.2854	77.3022	0.805219	2.69141	8.94868	7.62204	1442082_at	12267	complement component 3a receptor 1
					G-protein coupled receptor(PC00021)	Gpr65	5.13505	0.000762753	4.68728	0.00670208	5.12309	0.000313659	31.3275	1	17.4708	1328.32	8.89935	1.26637	8.29598	4.20426	1.51494	6.4471	2.10168	6.56127	1.1027	0.803068	5.13505	7.33058	1449175_at	14744	G-protein coupled receptor 65
					G-protein coupled receptor(PC00021)	S1pr3	3.69149	0.00051341	3.5762	0.0129598	3.69677	0.000854527	4.21675	68.7864	126.818	32.7103	31.4861	0.244135	2.06561	3.00835	1.50469	5.01579	6.40622	4.36894	1.05859	1.41147	3.69149	4.77756	1437173_at	13610	sphingosine-1-phosphate receptor 3
o		histidine kinase receptor of two-component system
o		serine/threonine protein kinase receptor			serine/threonine protein kinase receptor(PC00205)	Tgfbr1	3.15082	0.000463134	2.02204	0.00375205	2.40744	0.000172466	696.753	406.147	938.02	17634.7	1386.74	1.04421	1.76065	1.99332	1.55062	1.82369	2.15763	4.20617	1.04931	1.7367	3.15082	3.43845	1420895_at	21812	transforming growth factor, beta receptor I
o		tyrosine protein kinase receptor
•	transporter				transporter(PC00227)	Laptm5	5.86562	0.00018492	3.34624	0.00375205	3.54188	9.7225e-05	198.811	52.4121	40.0394	44724.5	916.817	0.741185	1.95267	8.73523	0.979371	6.65335	6.2781	22.3429	1.02172	2.49759	5.86562	6.60434	1436905_x_at	16792	lysosomal-associated protein transmembrane 5
					transporter(PC00227)	Ms4a6d	13.2346	0.00135665	5.01236	0.0159573	7.54239	0.000118939	4.88604	9.59561	3.46574	1960.45	16.5504	1.48419	4.35829	10.0212	4.59963	6.12274	6.5767	7.87677	0.722786	3.62998	13.2346	19.5253	1419598_at	68774	membrane-spanning 4-domains, subfamily A, member 6D
					transporter(PC00227)	Ms4a7	2.71987	0.00410348	6.79715	0.00991069	23.2096	0.000201495	34.2794	62.7132	59.3908	869.694	66.1306	2.01	2.88523	9.10948	0.513334	3.81228	3.64883	3.97039	1.54391	2.31037	2.71987	7.19551	1424754_at	109225	membrane-spanning 4-domains, subfamily A, member 7
					transporter(PC00227)	Plscr2	10.6588	0.00261457	2.91554	0.0182413	3.94607	0.000352705	29.9031	13.3886	19.8408	3.73873	3.82813	0.907497	1.39358	2.01443	1.08188	3.1531	2.58038	7.25771	0.531897	2.69465	10.6588	6.88391	1448961_at	18828	phospholipid scramblase 2
					transporter(PC00227)	Slc14a1	3.16656	0.000260746	2.64721	0.00364569	2.68173	0.000155477	48.9651	4.89072	3145.02	37.7226	9.0697	1.04656	2.10932	2.84099	1.06533	2.70657	3.35116	5.60701	1.10235	2.38499	3.16656	3.46242	1428114_at	108052	solute carrier family 14 (urea transporter), member 1
					transporter(PC00227)	Slc15a3	4.65951	0.000123194	7.33823	0.00431475	15.6043	0.000653506	3.91369	8.14264	9.59137	3638.76	81.7894	2.48643	4.9187	13.4008	0.783319	10.5047	7.45428	20.3727	1.77704	4.34517	4.65951	8.15415	1420697_at	65221	solute carrier family 15, member 3
o		ion channel			ion channel(PC00133)	Clic1	3.32602	0.000860988	2.2785	0.00714935	2.18384	0.000586156	427.925	137.357	1023.6	3585.26	120.838	1.27886	1.55524	3.60934	0.894972	1.98107	1.97493	2.58721	1.0903	1.34811	3.32602	2.55194	1416656_at	114584	chloride intracellular channel 1
			ligand-gated ion channel
			voltage-gated ion channel
o		primary active transporter			primary active transporter(PC00068)	Fxyd1	2.5663	0.000400875	2.22275	0.00555739	2.48129	0.000113221	316.5	366.171	8276.56	11.9391	97.7777	3.21276	1.80626	4.81009	0.635566	1.99568	2.50807	5.4982	1.58698	1.57167	2.5663	3.0879	1421374_a_at	56188	FXYD domain-containing ion transport regulator 1
			ATP synthase
			ATP-binding cassette (ABC) transporter
o		secondary carrier transporter			secondary carrier transporter(PC00258)	Slc11a1	3.26329	0.000194032	2.87219	0.00388086	3.62709	0.000119401	57.9354	137.74	74.7393	3253.75	122.415	2.11681	2.40052	3.36611	0.978353	3.80642	2.45743	5.28772	1.06458	1.78266	3.26329	3.61554	1420361_at	18173	solute carrier family 11 (proton-coupled divalent metal ion transporters), member 1
					secondary carrier transporter(PC00258)	Slc5a3	2.43854	0.00112285	2.12513	0.0178938	2.11576	0.000216418	1759.87	2109.49	1667.49	1218.21	2547.89	0.879601	1.32079	1.22297	1.07125	2.13457	1.96319	2.73628	1.05742	1.39136	2.43854	2.70727	1435484_at	53881	solute carrier family 5 (inositol transporters), member 3
			amino acid transporter
			mitochondrial carrier protein
•	viral or transposable element protein				viral or transposable element protein(PC00237)	Naip2	2.92048	0.0216849	3.25803	0.00443154	4.11333	0.00191362	19.6882	28.3847	14.0549	2627.4	19.2139	1.21855	3.28815	2.25866	0.297826	2.74988	2.22754	2.57121	0.758934	1.71648	2.92048	2.81399	1460273_a_at	17948	NLR family, apoptosis inhibitory protein 2
					viral or transposable element protein(PC00237)	Naip5	2.7971	0.0061677	2.96527	0.00400642	3.66298	0.00908106	20.8183	2.72964	8.65284	3845.86	50.0716	1.2807	3.47386	5.91695	0.736505	3.62872	2.15988	3.03577	1.35925	1.72506	2.7971	1.79897	1421525_a_at	17951	NLR family, apoptosis inhibitory protein 5
o		reverse transcriptase
	unclassified by PANTHER Protein Class					Bcl2a1a///Bcl2a1b///Bcl2a1d	5.31741	0.00135742	6.95289	0.00364569	10.6829	0.000155477	55.9128	11.9691	72.441	4897.55	118.013	2.11464	2.3543	8.12167	0.557002	8.92193	7.44241	30.2274	1.00634	4.40972	5.31741	16.2366	1419004_s_at	12044///12045///12047	B cell leukemia/lymphoma 2 related protein A1a///B cell leukemia/lymphoma 2 related protein A1b///B cell leukemia/lymphoma 2 related protein A1d
						Cd52	8.83762	0.000123194	11.725	0.00328734	11.0685	9.09841e-05	31.6275	15.0791	22.6783	21376.9	28.7252	1.29854	7.42658	13.1092	1.14235	12.0489	9.63558	43.1191	1.19181	4.39289	8.83763	6.45561	1460218_at	23833	CD52 antigen
						Cd72	3.37116	0.000942894	10.9389	0.00861893	10.2393	0.0267225	29.9847	29.5319	18.4656	402.666	38.5818	6.55093	2.72969	5.24331	1.11297	6.99498	2.42674	3.48019	0.683748	2.90979	3.37116	5.46852	1426112_a_at	12517	CD72 antigen
						Clec7a	10.1641	0.000109088	19.2373	0.00328734	25.0916	3.15058e-05	88.101	26.5813	40.6422	4563.68	44.0983	2.99656	12.7389	12.4224	0.961074	9.73037	9.4976	43.919	1.09654	5.61622	10.1641	8.71959	1420699_at	56644	C-type lectin domain family 7, member a
						Cnn3	2.99274	0.00031036	2.21647	0.00727766	2.33799	0.000172466	1177.79	423.915	11095.7	214.739	2166.58	0.627646	1.51163	2.23739	1.03065	1.71126	2.23385	3.72478	1.05207	1.60061	2.99274	3.62212	1426724_at	71994	calponin 3, acidic
						Cst7	88.1878	6.59292e-05	56.4165	0.00328734	58.4848	0.000794392	3.22499	12.1139	37.6118	565.489	7.33003	20.7822	26.9181	95.4986	0.986177	48.3097	77.6287	146.523	0.882648	19.4838	88.1878	149.629	1419202_at	13011	cystatin F (leukocystatin)
						Ctla2b	2.64966	0.00549304	3.60321	0.00443154	3.71947	0.00153997	36.9974	28.9034	40.5482	3746.73	6.94591	1.99373	1.40825	3.29642	2.98805	1.84507	1.80907	8.14511	1.37875	1.46753	2.64966	4.78579	1452352_at	13025	cytotoxic T lymphocyte-associated protein 2 beta
						Cyba	4.68917	0.000248001	4.89259	0.00375205	6.85362	6.34771e-05	17.0414	10.2536	675.163	14659.1	29.6222	1.3748	3.68494	20.2661	5.78462	4.82067	2.60834	46.0187	1.05558	2.66573	4.68916	6.80591	1454268_a_at	13057	cytochrome b-245, alpha polypeptide
						Fam46c	3.68876	0.0211449	8.70423	0.00364569	12.1222	0.000155477	10.0887	31.5581	65.8818	10037.4	33.5528	1.52382	9.30066	31.4797	4.03148	7.34731	7.74458	109.511	1.59121	1.60093	3.68876	3.73363	1448021_at	74645	family with sequence similarity 46, member C
						Fermt3	4.19893	0.0211449	3.61938	0.0307282	2.96073	0.000653506	6.99205	4.46598	13.6331	2043.69	12.4294	1.44115	3.19249	1.48336	1.38517	6.71494	2.32552	2.89642	0.911413	2.93575	4.19893	4.83973	1433963_a_at	108101	fermitin family homolog 3 (Drosophila)
						Flnc	3.63053	0.000393412	2.52632	0.0318429	4.27138	0.00032498	19.1575	30.7437	122.134	24.0862	64.7836	2.04665	3.39572	9.45251	0.431585	4.23381	4.21739	6.04948	1.14222	1.87391	3.63053	4.82266	1449073_at	68794	filamin C, gamma
						Fmod	3.24673	0.00106952	3.74314	0.0057767	4.02496	0.00579378	11.6924	155.408	177.846	33.5079	17.1007	0.955341	1.01833	4.1942	0.729344	3.45297	3.06207	15.3	1.11086	1.37852	3.24673	4.05763	1415939_at	14264	fibromodulin
						Gpsm3	2.08417	0.00395555	2.08584	0.0132194	2.38731	0.000854527	54.6315	116.178	24.7656	1637.43	21.8089	0.665182	0.717306	2.9583	0.536505	2.68909	1.88649	6.44777	1.45119	1.3851	2.08417	2.01117	1418396_at	106512	G-protein signalling modulator 3 (AGS3-like, C. elegans)
						Grn	3.77292	0.000197874	3.59074	0.00652651	4.19778	5.41797e-05	173.682	1167.33	2228.8	10945.3	1390.44	2.187	2.29486	4.05628	1.01972	2.63211	2.23514	8.76594	1.41271	1.72999	3.77292	4.89676	1448148_at	14824	granulin
						Gusb	4.21356	0.00025589	2.92952	0.00415802	3.90091	9.89284e-05	62.3229	148.006	974.038	2583.63	1126	3.5858	1.87184	2.73487	1.24179	2.75652	2.73366	6.83617	1.30397	2.13817	4.21356	5.34829	1448124_at	110006	glucuronidase, beta
						Inpp5d	2.20433	0.00196424	2.03068	0.0085761	2.79672	0.00022986	63.689	133.017	111.67	6970.56	71.7484	1.11565	2.28806	2.23572	0.626814	2.33726	2.05322	5.66837	1.13703	1.41442	2.20433	3.83603	1418110_a_at	16331	inositol polyphosphate-5-phosphatase D
						Ly86	3.11023	0.00475807	4.35281	0.00375205	3.02574	6.74028e-05	321.944	6.65567	27.2683	28770.7	290.355	1.25843	4.45212	5.6355	1.03897	7.43921	4.78945	19.4632	0.975987	1.78037	3.11023	3.16496	1422903_at	17084	lymphocyte antigen 86
						Mdfic	2.16232	0.0271167	4.27458	0.00375205	4.03408	0.00264984	49.4275	201.121	1695.65	1309.62	23.3949	2.11409	2.31366	2.01753	2.27996	2.62992	2.59514	7.04729	1.26673	1.96026	2.16232	3.61334	1427040_at	16543	MyoD family inhibitor domain containing
						Mpeg1	10.2392	0.000109088	6.54049	0.00363248	10.814	4.1914e-05	32.6198	11.8251	9.84455	25343.2	249.374	1.23837	3.92994	26.2185	1.20369	11.6353	12.5999	102.599	1.02317	4.48098	10.2392	13.5411	1427076_at	17476	macrophage expressed gene 1
						Mylk	3.3597	0.00250302	3.16752	0.0127322	3.09586	9.74739e-05	78.9707	59.6372	229.939	51.6011	55.943	0.785069	1.45977	2.23802	0.881688	1.88803	1.71102	4.69181	0.760591	1.33871	3.3597	4.39392	1425505_at	107589	myosin, light polypeptide kinase
						Naglu	2.48346	0.00151803	2.11718	0.0226604	2.34689	9.7225e-05	103.107	208.474	421.869	1099.99	287.435	2.9699	2.18633	3.48985	0.686518	1.9133	2.33132	3.73562	0.912626	1.47882	2.48346	3.06513	1417706_at	27419	alpha-N-acetylglucosaminidase (Sanfilippo disease IIIB)
						Nckap1l	2.5478	0.000368751	2.64413	0.00431475	3.82555	8.0247e-05	144.807	127.742	64.141	8770.03	128.578	1.09411	2.4784	2.87616	0.880826	2.31911	2.08537	7.95712	1.07217	1.86681	2.5478	3.68967	1428786_at	105855	NCK associated protein 1 like
						Nupr1	7.65016	0.00077814	7.54597	0.0180499	9.08572	0.000429536	124.101	15.1797	541.003	1005.62	6.88308	1.12962	4.24335	50.909	1.28556	11.2564	5.92091	228.329	1.44353	1.30487	7.65016	15.6432	1419665_a_at	56312	nuclear protein transcription regulator 1
						Palld	2.90369	0.00711343	2.14714	0.00413798	2.4638	0.000168229	563.163	60.1557	450.917	135.924	86.4255	0.639756	1.18208	1.68851	1.35574	1.60277	1.4385	2.72697	1.33755	1.4431	2.90369	4.15509	1433768_at	72333	palladin, cytoskeletal associated protein
						Pbxip1	2.26654	0.00179679	2.0156	0.00727766	2.03121	0.000246421	117.246	166.557	4831.96	2221.23	170.681	1.09208	1.77066	2.72498	0.620144	2.36531	2.07383	4.41109	0.954854	1.5553	2.26654	2.67148	1460344_at	229534	pre B cell leukemia transcription factor interacting protein 1
						Pdpn	2.71991	0.00104865	2.21855	0.0114204	2.42338	0.00937976	34.9455	283.247	2795.08	293.666	65.7693	0.729498	1.55374	2.66233	0.974653	2.05242	2.12251	5.76725	1.20088	1.44565	2.71991	3.48403	1419309_at	14726	podoplanin
						Pon3	5.26184	0.0151627	3.33524	0.00561865	3.91545	0.000240551	66.1425	39.0991	23.0846	883.966	13.9254	2.70565	3.62576	2.83	0.832509	2.08854	2.21557	4.22048	0.784752	2.55447	5.26184	11.3203	1419298_at	269823	paraoxonase 3
						Pros1	2.32548	0.00116436	2.36816	0.0066246	2.50665	0.000279478	80.3759	52.5362	598.117	3400.38	87.746	1.18072	1.80752	3.31874	1.24945	2.29634	2.3769	3.78933	1.03272	1.3616	2.32548	3.32919	1426246_at	19128	protein S (alpha)
						Ptx3	8.04793	0.000463134	5.93612	0.00845771	4.10939	0.00039369	19.9948	89.3803	145.734	28.7018	11.2243	1.40616	2.84165	8.43077	0.768111	4.49742	6.83159	9.39591	1.07108	3.96018	8.04793	21.0287	1418666_at	19288	pentraxin related gene
						Tagln2	2.58504	0.000941757	3.35098	0.00727766	3.88093	0.000550626	251.008	284.042	350.78	1303.52	207.786	1.03724	2.04305	3.49153	0.811731	1.86893	2.25025	3.54664	1.19924	1.30157	2.58504	2.15403	1426529_a_at	21346	transgelin 2
						Tm4sf1	4.53684	0.000341283	2.86027	0.00364569	2.77511	0.000638568	103.56	33.261	685.283	47.1573	5.34732	1.96482	1.28927	1.73088	0.42658	1.82928	1.58291	7.9555	0.949867	1.43667	4.53684	5.76549	1450958_at	17112	transmembrane 4 superfamily member 1
						Tmem176a	2.09148	0.00377253	2.48579	0.00971357	3.18254	0.00111588	15.7725	205.232	712.226	8012.56	53.8325	0.914581	2.51048	4.24967	0.828692	3.67143	2.82477	12.3998	1.42513	1.3345	2.09148	2.92772	1425603_at	66058	transmembrane protein 176A
						Tmem176b	2.68553	0.000583557	2.17314	0.00491252	2.39868	0.00032498	479.672	905.023	9493.86	16011.9	497.905	1.31299	2.02305	2.58238	0.744228	2.31921	2.20428	5.35125	1.33267	1.67298	2.68553	3.35883	1418004_a_at	65963	transmembrane protein 176B
						Tspo	2.6187	0.000368751	2.29206	0.00670208	2.47964	0.000690287	81.0323	181.365	346.678	3164.33	11.4953	1.48362	1.78287	2.66277	0.77266	1.62238	1.76082	5.05233	1.28181	1.50054	2.6187	2.74629	1416695_at	12257	translocator protein
